# Supplementary material
Source: PubMed Central journal article supplement (PMC5687060)
Supplement: NIHMS913060-supplement-supporting_material.pdf [file NIHMS913060-supplement-supporting_material.pdf]

# SUPPORTING INFORMATION

## Evaluating Nitrogen Containing Biosynthetic Products Produced by Saltwater Culturing of Several California Littoral Zone Gram-Negative Bacteria

Nicholas Lorig-Roach, Patrick C. Still, David Coppage, Jennifer E. Compton, Mitchell S. Crews,  
Gabriel Navarro, Karen Tenney, and Phillip Crews\*

Department of Chemistry and Biochemistry, University of California, Santa Cruz, CA 95064

\*To whom correspondence should be addressed. Email: pcrews@ucsc.edu; Phone: 831-459-2603.

|                                                                                                                                 | Page Number |
|---------------------------------------------------------------------------------------------------------------------------------|-------------|
| <b>Table S1.</b> Media and artificial seawater recipes                                                                          | 2           |
| <b>Table S2.</b> Comparative $^{13}\text{C}$ NMR data between <b>(1)</b> and related $\beta$ -carboline                         | 3           |
| <b>Figure S1.</b> ESI-FTMS accurate mass spectra of 1-methyl-4-methylthio- $\beta$ -carboline ( <b>1</b> )                      | 4           |
| <b>Figure S2.</b> $^1\text{H}$ NMR spectrum of <b>(1)</b> , (600 MHz, $\text{DMSO-d}_6$ )                                       | 5           |
| <b>Figure S3.</b> $^{13}\text{C}$ NMR spectrum of <b>(1)</b> , (150 MHz, $\text{DMSO-d}_6$ )                                    | 6           |
| <b>Figure S4.</b> gHSQC NMR spectrum of <b>(1)</b> , (600 MHz, $\text{DMSO-d}_6$ )                                              | 7           |
| <b>Figure S5.</b> gHMBCAD NMR spectrum of <b>(1)</b> , (600 MHz, $\text{DMSO-d}_6$ )                                            | 8           |
| <b>Figure S6.</b> gHMBCAD NMR spectrum (downfield expansion) of <b>(1)</b> , (600 MHz, $\text{DMSO-d}_6$ )                      | 9           |
| <b>Figure S7.</b> gHMBCAD NMR spectrum ( $^1J_{\text{CH}}$ measurements) of <b>(1)</b> , (600 MHz, $\text{DMSO-d}_6$ )          | 10          |
| <b>Figure S8.</b> gHMBCAD NMR spectrum ( $^1J_{\text{CH}}$ measurements, methyls) of <b>(1)</b> , (600 MHz, $\text{DMSO-d}_6$ ) | 11          |
| <b>Figure S9.</b> $^1\text{H}$ - $^1\text{H}$ COSY NMR spectrum of <b>(1)</b> , (600 MHz, $\text{DMSO-d}_6$ )                   | 12          |
| <b>Figure S10.</b> NOESY NMR spectrum of <b>(1)</b> , (600 MHz, $\text{DMSO-d}_6$ )                                             | 13          |
| <b>Figure S11.</b> 1D nOe NMR spectra of <b>(1)</b> irradiated at 2.65 ppm, (600 MHz, $\text{DMSO-d}_6$ )                       | 14          |
| <b>Figure S12.</b> UV spectrum (200-600nm) of 1-methyl-4-methylthio- $\beta$ -carboline ( <b>1</b> )                            | 15          |
| <b>Figure S13.</b> IR spectrum of 1-methyl-4-methylthio- $\beta$ -carboline ( <b>1</b> )                                        | 16          |
| <b>Figure S14.</b> 1-methyl-4-methylthio- $\beta$ -carboline ( <b>1</b> ) isolation scheme.                                     | 17          |
| <b>Figure S15.</b> Examples of challenging ‘Crews rule’ compounds from the literature                                           | 18          |
| <b>Figure S16.</b> Querying medium 4 control for m/z 229.0794                                                                   | 19          |
| <b>Figure S17.</b> Querying for oxidized analogues of <b>1</b> .                                                                | 20          |
| <b>Chart S1.</b> Reference $^1J_{\text{CH}}$ coupling constants for relevant $\text{sp}^2$ carbons.                             | 21          |

**Table S1: Media and artificial seawater recipes**

|                                |                                                                                                                                                                                                                                                                                                                                                                                                                                                               |
|--------------------------------|---------------------------------------------------------------------------------------------------------------------------------------------------------------------------------------------------------------------------------------------------------------------------------------------------------------------------------------------------------------------------------------------------------------------------------------------------------------|
| <b>Seawater Salts (SWS)</b>    | Per liter:<br>8.0g $\text{MgSO}_4 \cdot 7\text{H}_2\text{O}$ ; 1.0g $\text{CaCl}_2 \cdot 2\text{H}_2\text{O}$ ; 0.5g KCl; 0.16 g $\text{NaHCO}_3$ ; 0.02 g $\text{H}_3\text{BO}_3$ ; 0.08 g KBr; 0.03g $\text{SrCl}_2 \cdot 6\text{H}_2\text{O}$ ; 0.01g $\beta$ -glycerophosphate-2Na; 0.1 g $\text{FeC}_6\text{H}_5\text{O}_7$ ; 1.0 mL trace element solution; 20.0g NaCl; pH 8.0.                                                                         |
| <b>Trace Elements Solution</b> | Per liter:<br>100 mg $\text{MnCl}_2 \cdot 4\text{H}_2\text{O}$ ; 20 mg $\text{CoCl}_2$ ; 10 mg $\text{CuSO}_4$ ; 10mg $\text{Na}_2\text{MoO}_4 \cdot 2\text{H}_2\text{O}$ ; 20 mg $\text{ZnCl}_2$ ; 5mg LiCl; 5mg $\text{SnCl}_2 \cdot 2\text{H}_2\text{O}$ ; 10mg $\text{H}_3\text{BO}_3$ ; 20 mg KBr; 20 mg KI; 8g EDTA-Na-Fe <sup>3+</sup> salt.                                                                                                           |
| <b>Medium 1 (M1)</b>           | Yeast extract 2.0g/L; Mannitol 4.0g/L; Peptone 2.0g/L; 75% SWS to volume; pH6.8.                                                                                                                                                                                                                                                                                                                                                                              |
| <b>Medium 2 (M2)</b>           | Glycerol 15 ml/L; L-glutamine 5.0g/L; $\text{K}_2\text{HPO}_4$ 1.5g/L; $\text{MgSO}_4$ 0.2g/L; $\text{DiH}_2\text{O}$ to volume; pH7.0.                                                                                                                                                                                                                                                                                                                       |
| <b>Medium 3 (M3)</b>           | Galactose 1.0g/L; Peptone 6.0g/L; Glycerol 0.8ml/L; Yeast Extract 2.5g/L; 75% SWS to volume; pH6.8.                                                                                                                                                                                                                                                                                                                                                           |
| <b>Medium 4 (M4)</b>           | Casitone 3.0g/L; $\text{MgSO}_4 \cdot 7\text{H}_2\text{O}$ 2.0g/L; $\text{CaCl}_2$ 0.5g/L; Trace Elements Solution 1.0 ml/L; Vitamin B12 Solution; 75% SWS to volume; pH6.8.                                                                                                                                                                                                                                                                                  |
| <b>Medium 5 (M5)</b>           | $\text{K}_2\text{HPO}_4$ 2.0g/L; $\text{NH}_4\text{Cl}$ 1.5g/L; $\text{MgSO}_4 \cdot 7\text{H}_2\text{O}$ 0.5g/L; Glycerol 8.0 ml/L; Myo-inositol 0.4g/L; Monosodium L-glutamate 5.0g/L; NaF 0.084g/L; $\text{FeSO}_4 \cdot 7\text{H}_2\text{O}$ 0.025g/L; $\text{ZnSO}_4 \cdot 7\text{H}_2\text{O}$ 0.01g/L; $\text{CoCl}_2 \cdot 6\text{H}_2\text{O}$ 0.01g/L; $\text{CaCO}_3$ 0.25g/L; p-aminobenzoate 0.001g/L; $\text{DiH}_2\text{O}$ to volume; pH 7.0. |

**Table S2.** Experimental  $^{13}\text{C}$  NMR data (125MHz,  $\text{DMSO-d}_6$ ,  $25^\circ\text{C}$ ) for 1-methyl-4-methylthio- $\beta$ -carboline (**1**) and literature data for related compounds: 1-ethyl-4-methylsulfone- $\beta$ -carboline (**3**)<sup>2</sup>, 1-methyl- $\beta$ -carboline (aka harman) (**4**)<sup>1</sup>, and 1-ethyl-4-methoxy- $\beta$ -carboline (aka crenatine) (**5**)<sup>1</sup>

| Carbon | <b>1</b>               | <b>3</b> | <b>4</b> | <b>5</b> |
|--------|------------------------|----------|----------|----------|
| 1      | 139.6 (C)              | 152.7    | 142.2    | 140.6    |
| 3      | 134.8 (CH)             | 139.9    | 137.6    | 120.0    |
| 4      | 125.2 (C)              | 119.2    | 112.6    | 151.0    |
| 4a     | 124.3 (C)              | no data  | 121.2    | 118.3    |
| 4b     | 120.9 (C)              | 126.7    | 127.0    | 119.6    |
| 5      | 123.4 (CH)             | 125.9    | 121.7    | 124.2    |
| 6      | 119.5 (CH)             | 121.7    | 119.2*   | 127.2    |
| 7      | 127.5 (CH)             | 129.8    | 127.8*   | 121.4    |
| 8      | 111.9 (CH)             | 111.9    | 112.0    | 111.3    |
| 8a     | 140.2 (C)              | 140.6    | 140.5    | 140.1    |
| 9a     | 133.8 (C)              | 133.7    | 134.6    | 135.3    |
| 1'     | 20.1 ( $\text{CH}_3$ ) | 27.5     | no data  | 26.8     |
| 2'     |                        | 12.2     |          | 13.3     |
| 4'     | 15.2 ( $\text{CH}_3$ ) | 43.2     |          | 56.1     |

\*Literature value errors corrected.

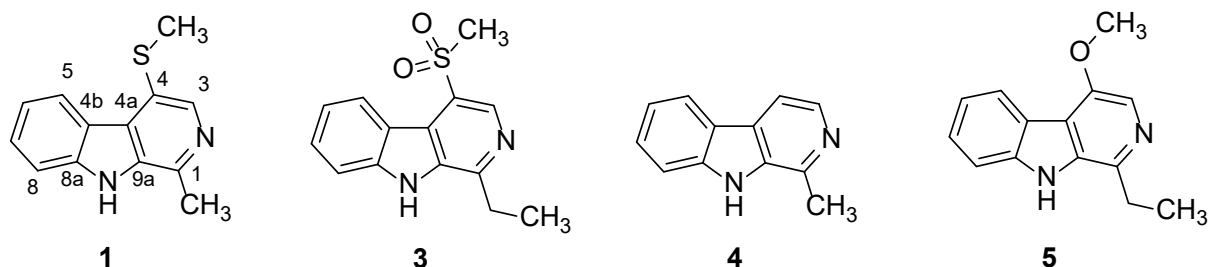

(1) Koike, K.; Sakamoto, Y.; Ohmoto, T. A  $^{13}\text{C}$  NMR Study of  $\beta$ -Carboline Alkaloids. *Org. Magn. Reson.* 1984, 22 (7), 471–473.

(2) Prinsep, M. R.; Blunt, J. W.; Munro, M. H. G. New Cytotoxic  $\beta$ -Carboline Alkaloids from the Marine Bryozoan, *Cribricellina Cribraria*. *J. Nat. Prod.* 1991, 54 (4), 1068–1076.

**Figure S1.** ESI-FTMS accurate mass spectra. Left panel: molecular ion cluster of **(1)** (top) compared to simulated spectra with and without sulfur (middle and bottom). Right panel: accurate MS<sup>2</sup> spectrum (top) showing loss of -SCH<sub>3</sub> and comparison of measured vs predicted ion cluster for m/z 182.0838 (bottom). In the MS<sup>2</sup> experiment, a capture width of +/- 6 Da centered on 229.08 was used so that all isotopic variants of **(1)** were captured for fragmentation.

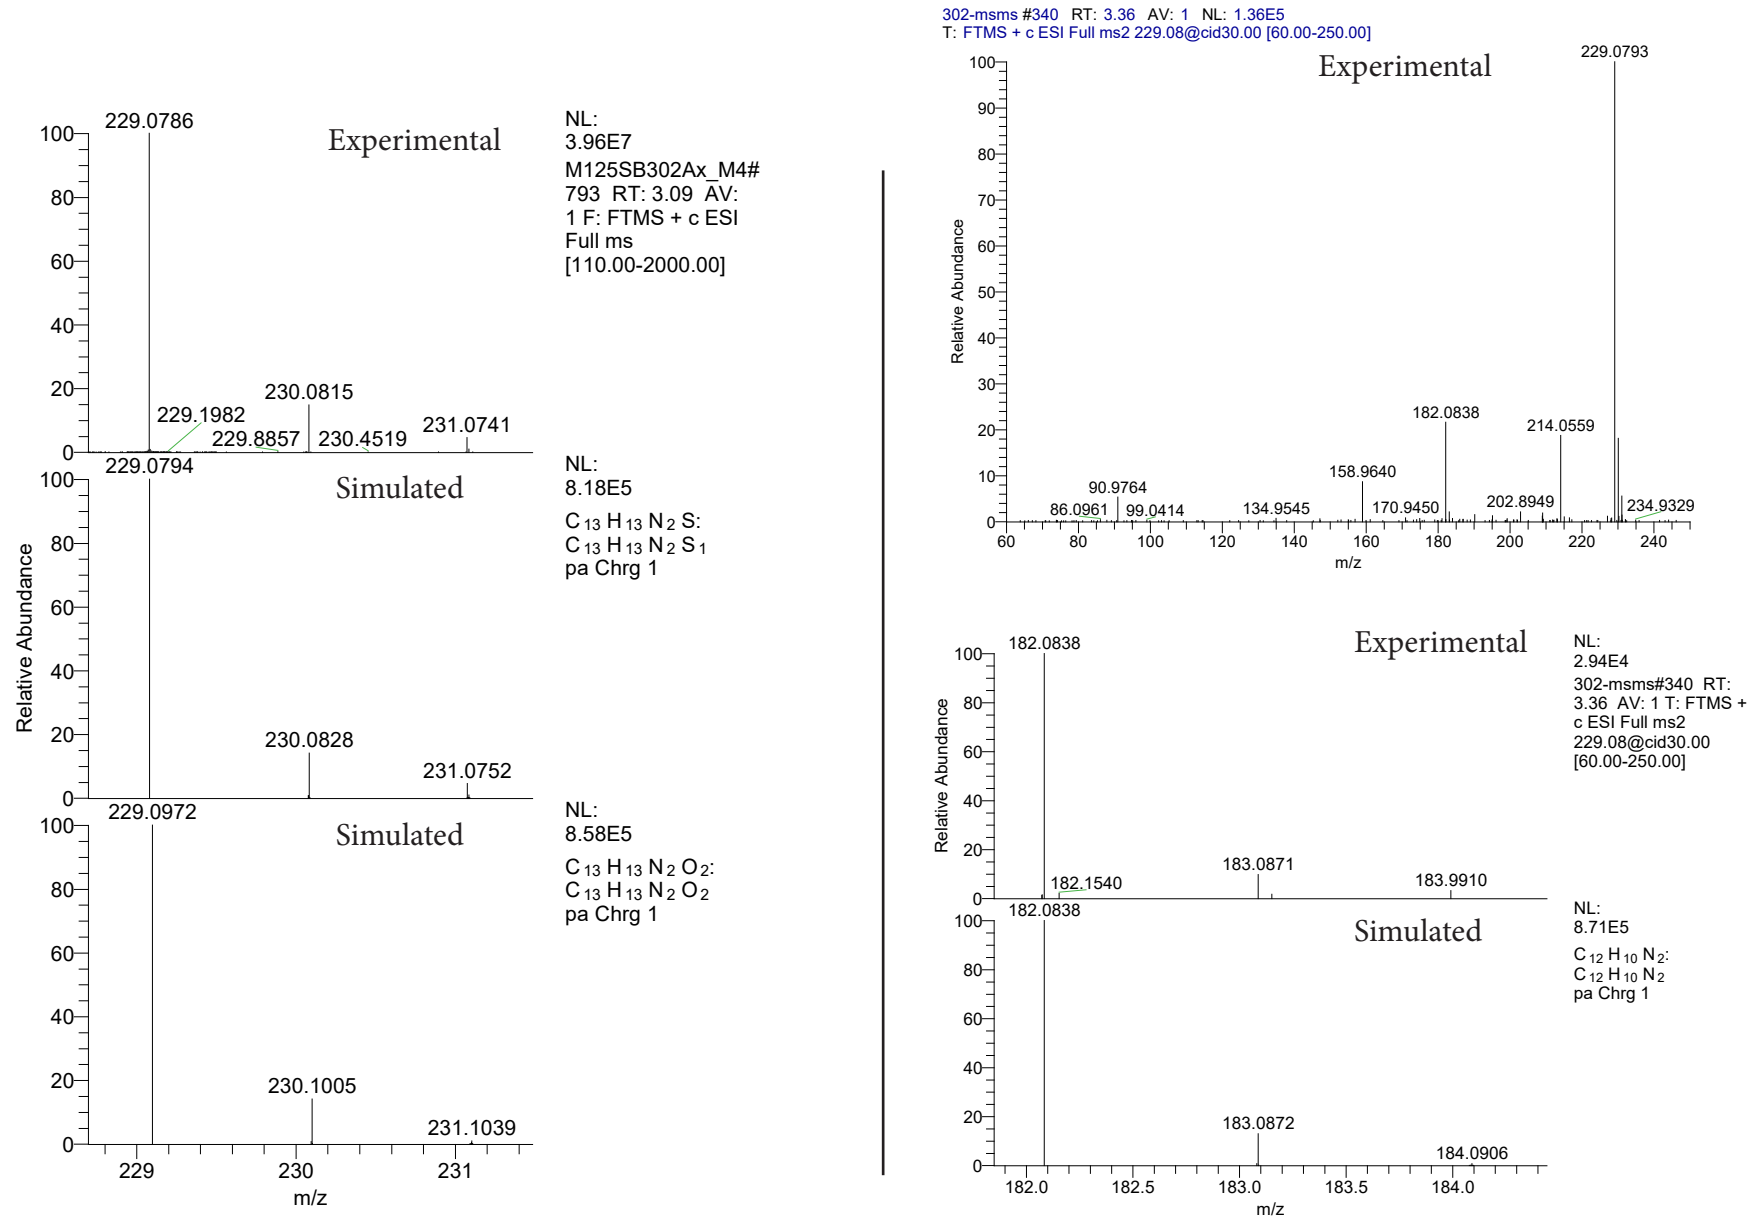

**Figure S2.**  $^1\text{H}$  NMR spectrum of 1-methyl-4methylthio- $\beta$ -carboline (1), (600 MHz, DMSO-d<sub>6</sub>).

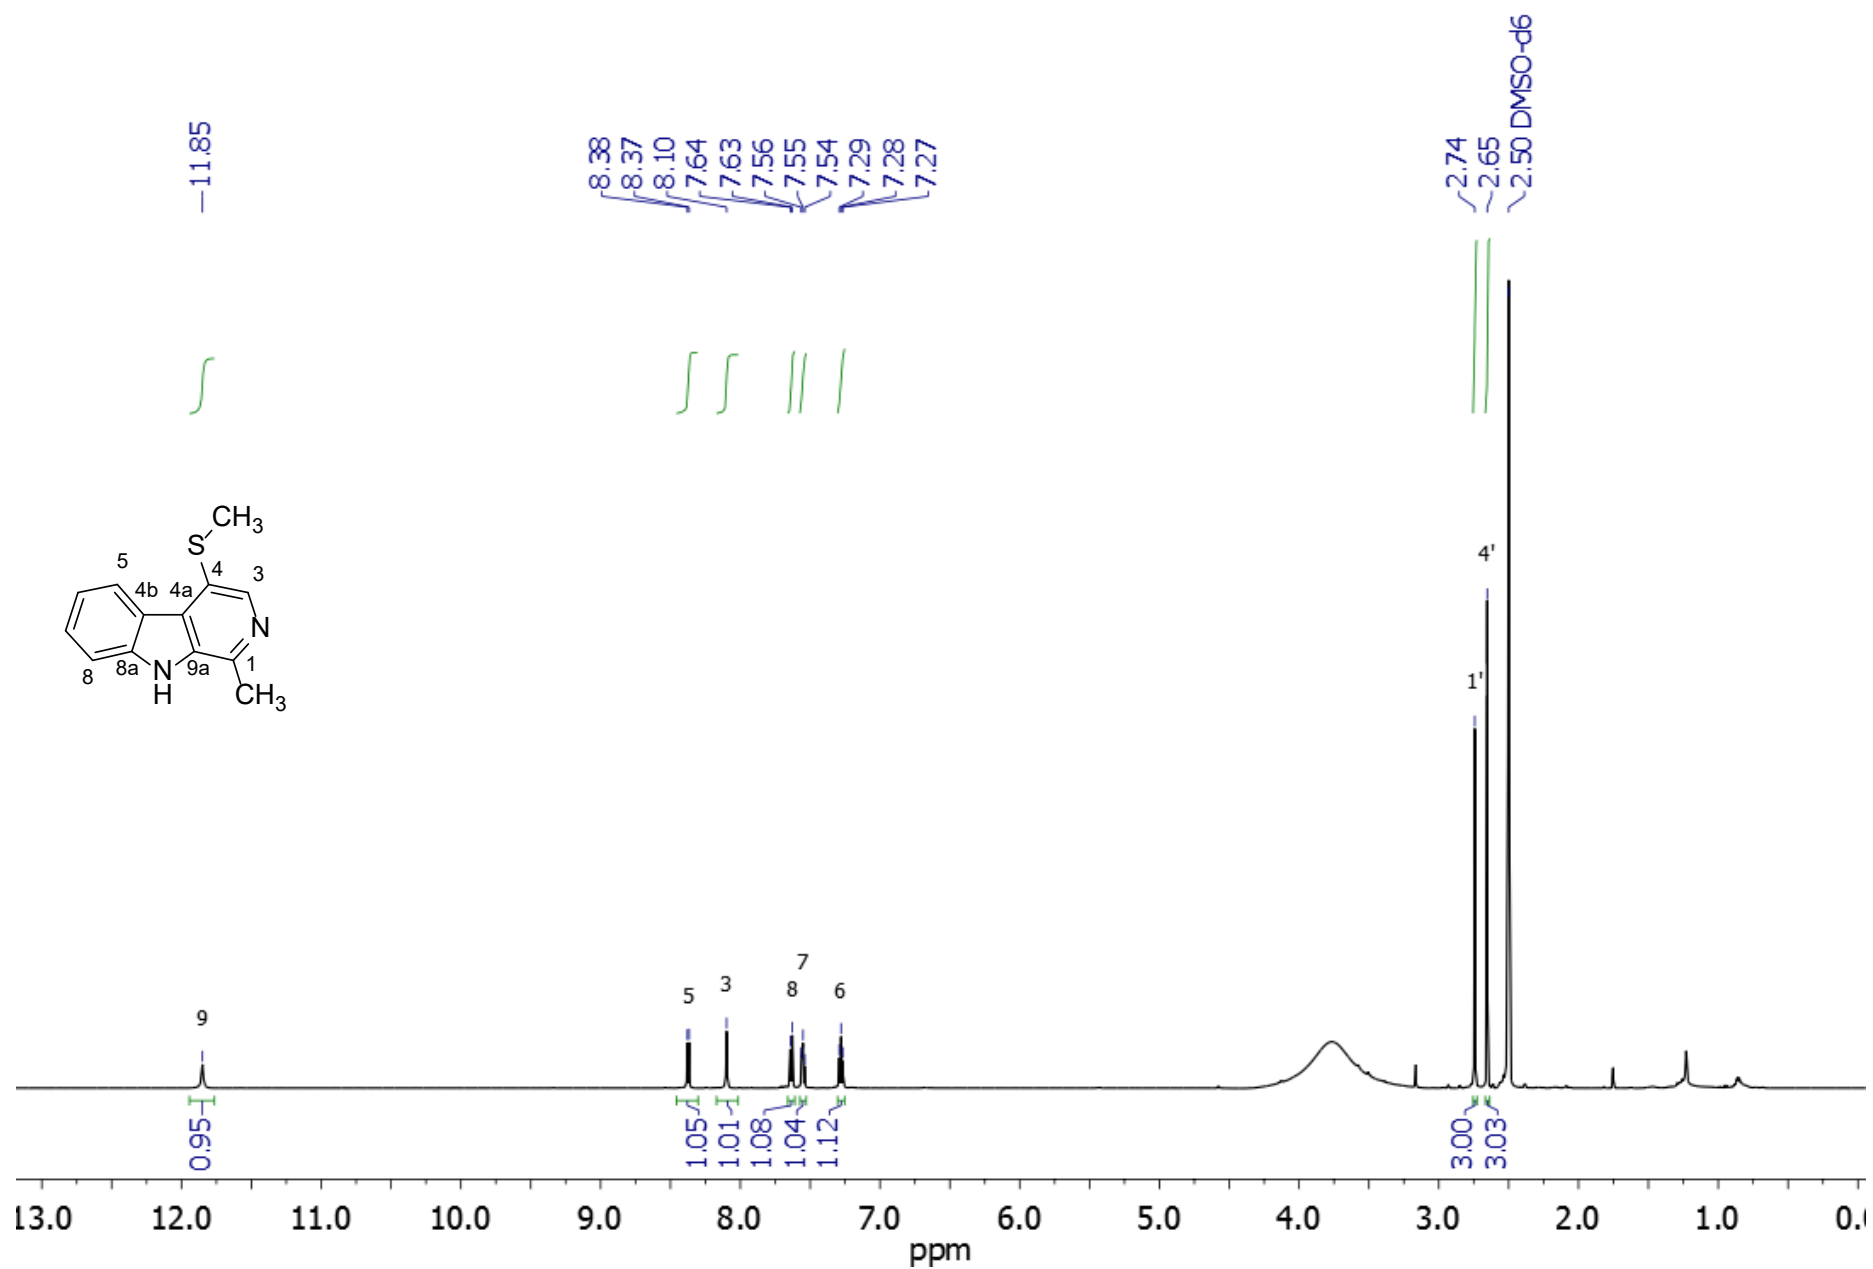

**Figure S3.**  $^{13}\text{C}$  NMR spectrum of 1-methyl-4methylthio- $\beta$ -carboline (1), (150 MHz, DMSO-d<sub>6</sub>).

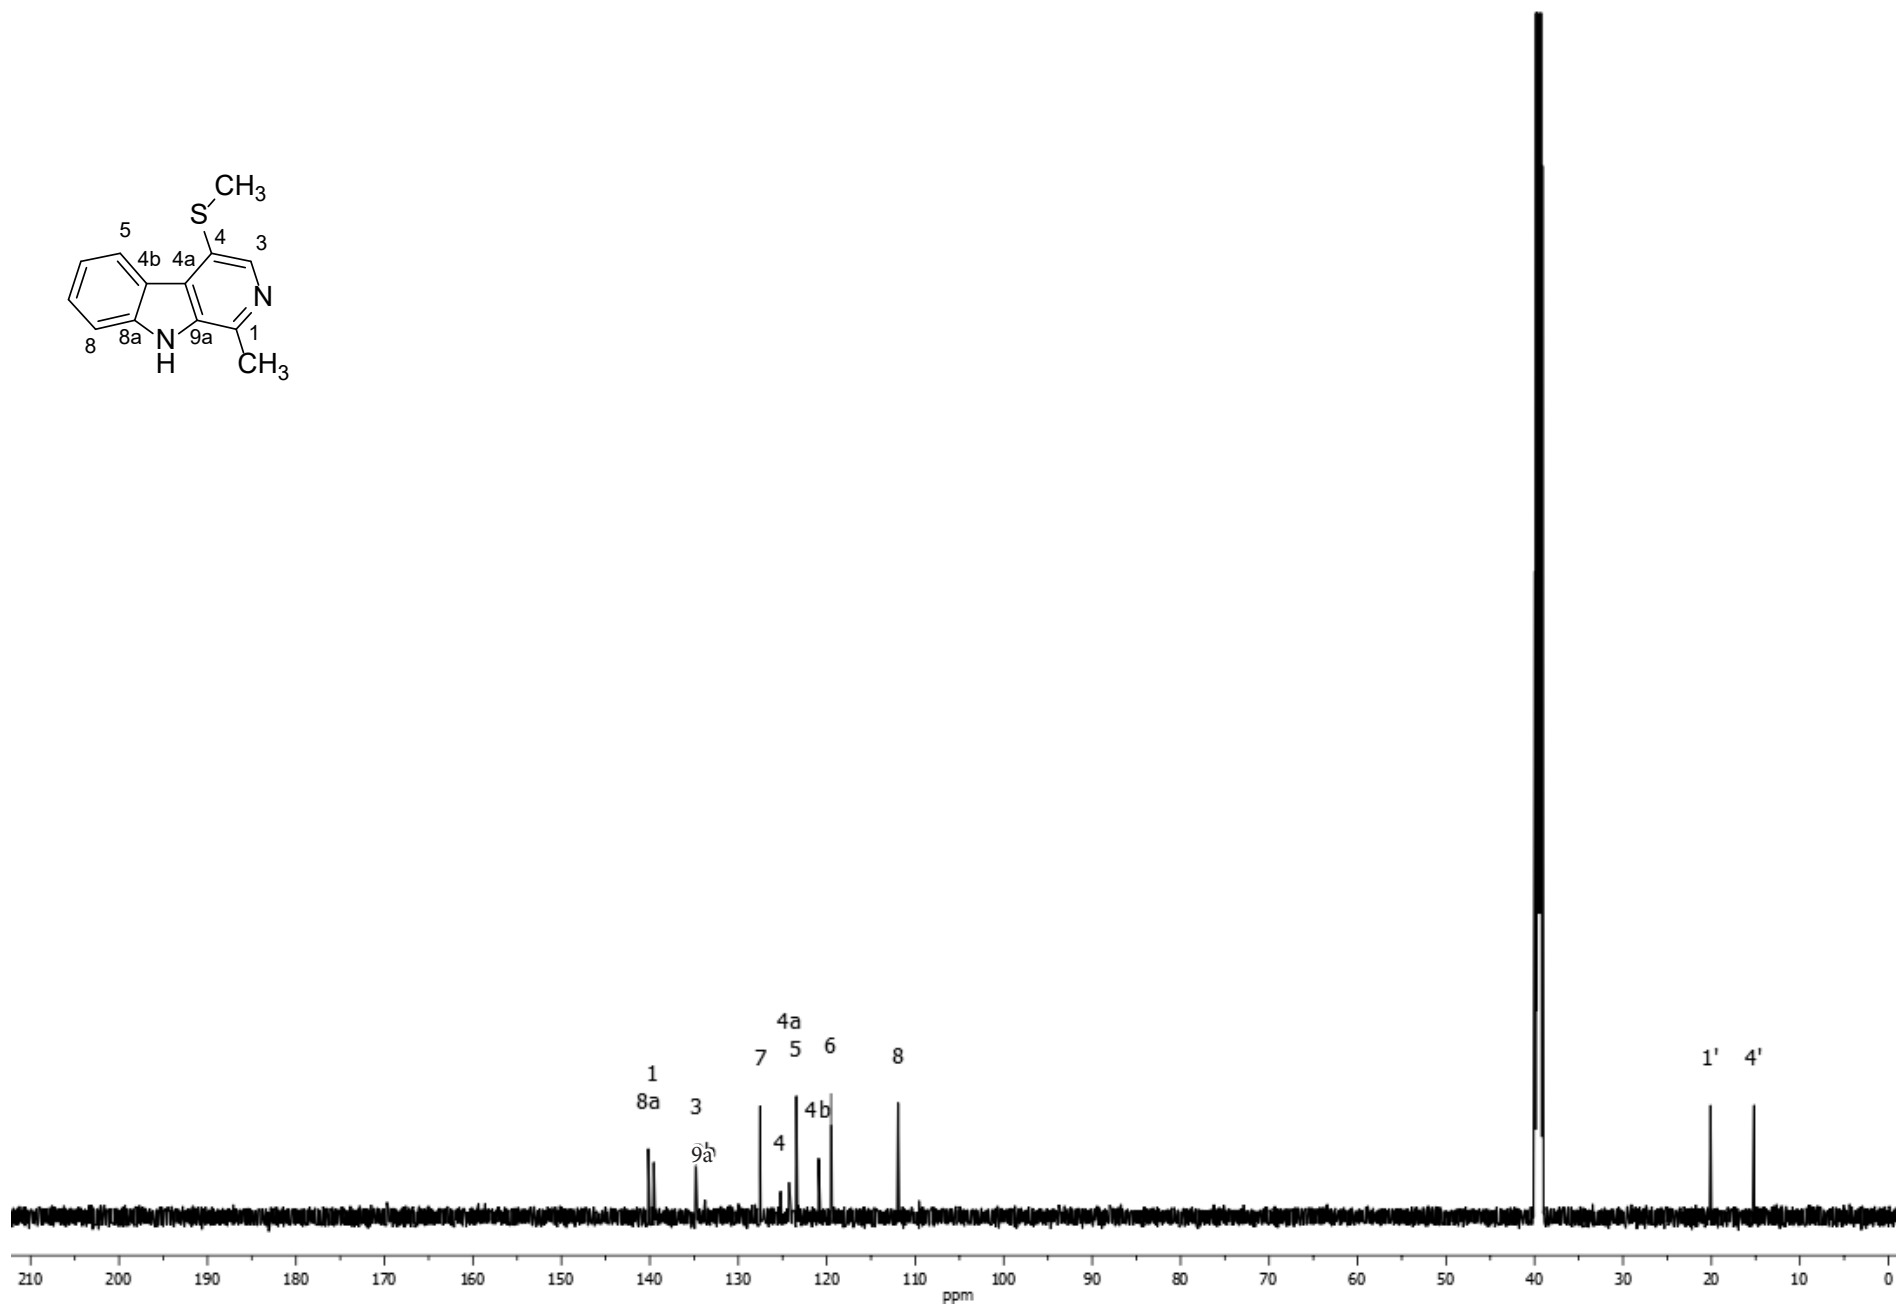

Figure S4. gHSQC NMR spectrum of 1-methyl-4methylthio- $\beta$ -carboline (1), (600 MHz, DMSO-d6)

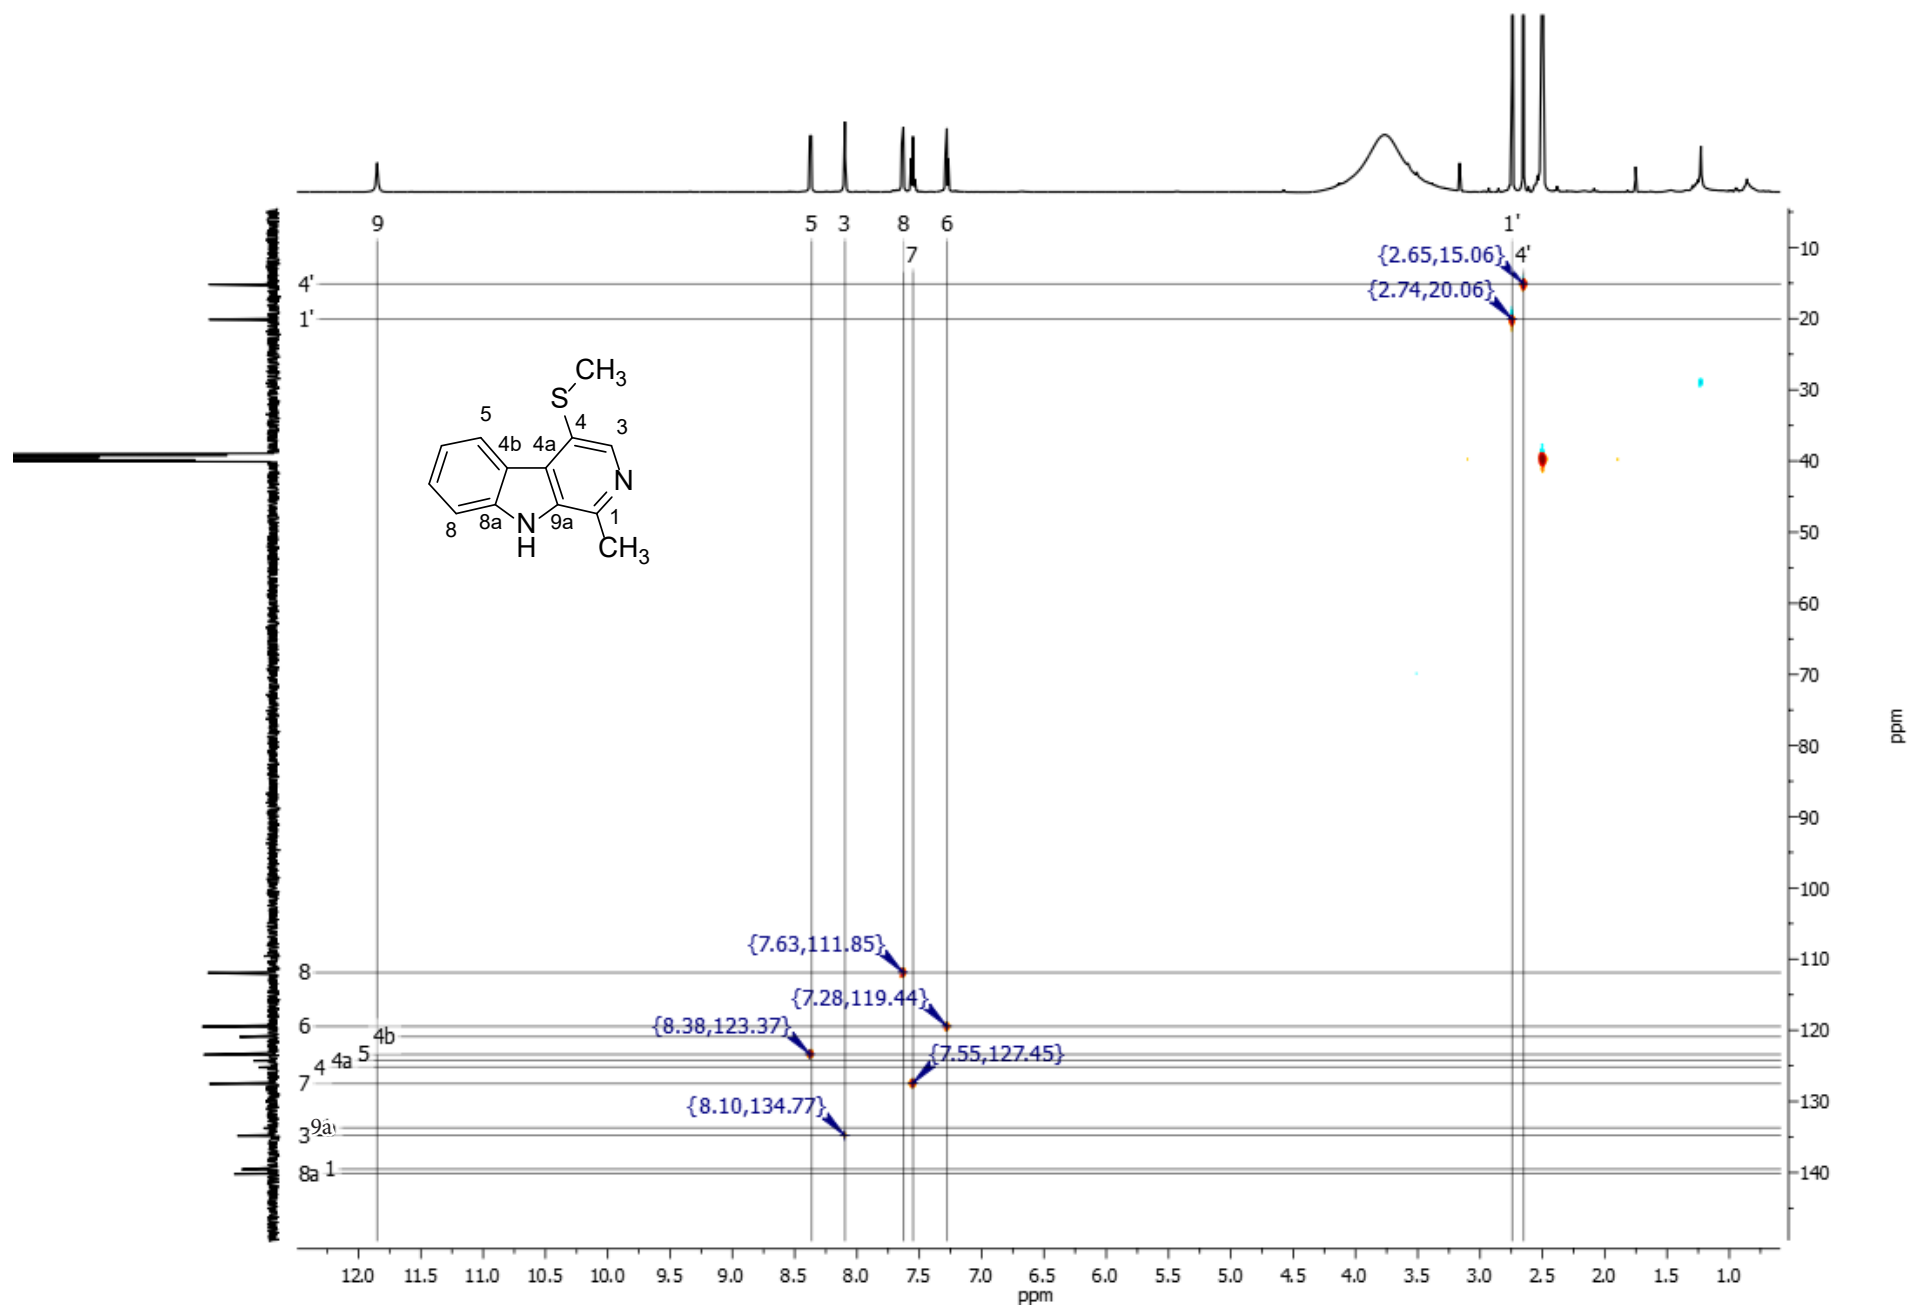

Figure S5. gHMBCAD NMR spectrum of 1-methyl-4methylthio- $\beta$ -carboline (1), (600 MHz, DMSO-d6)

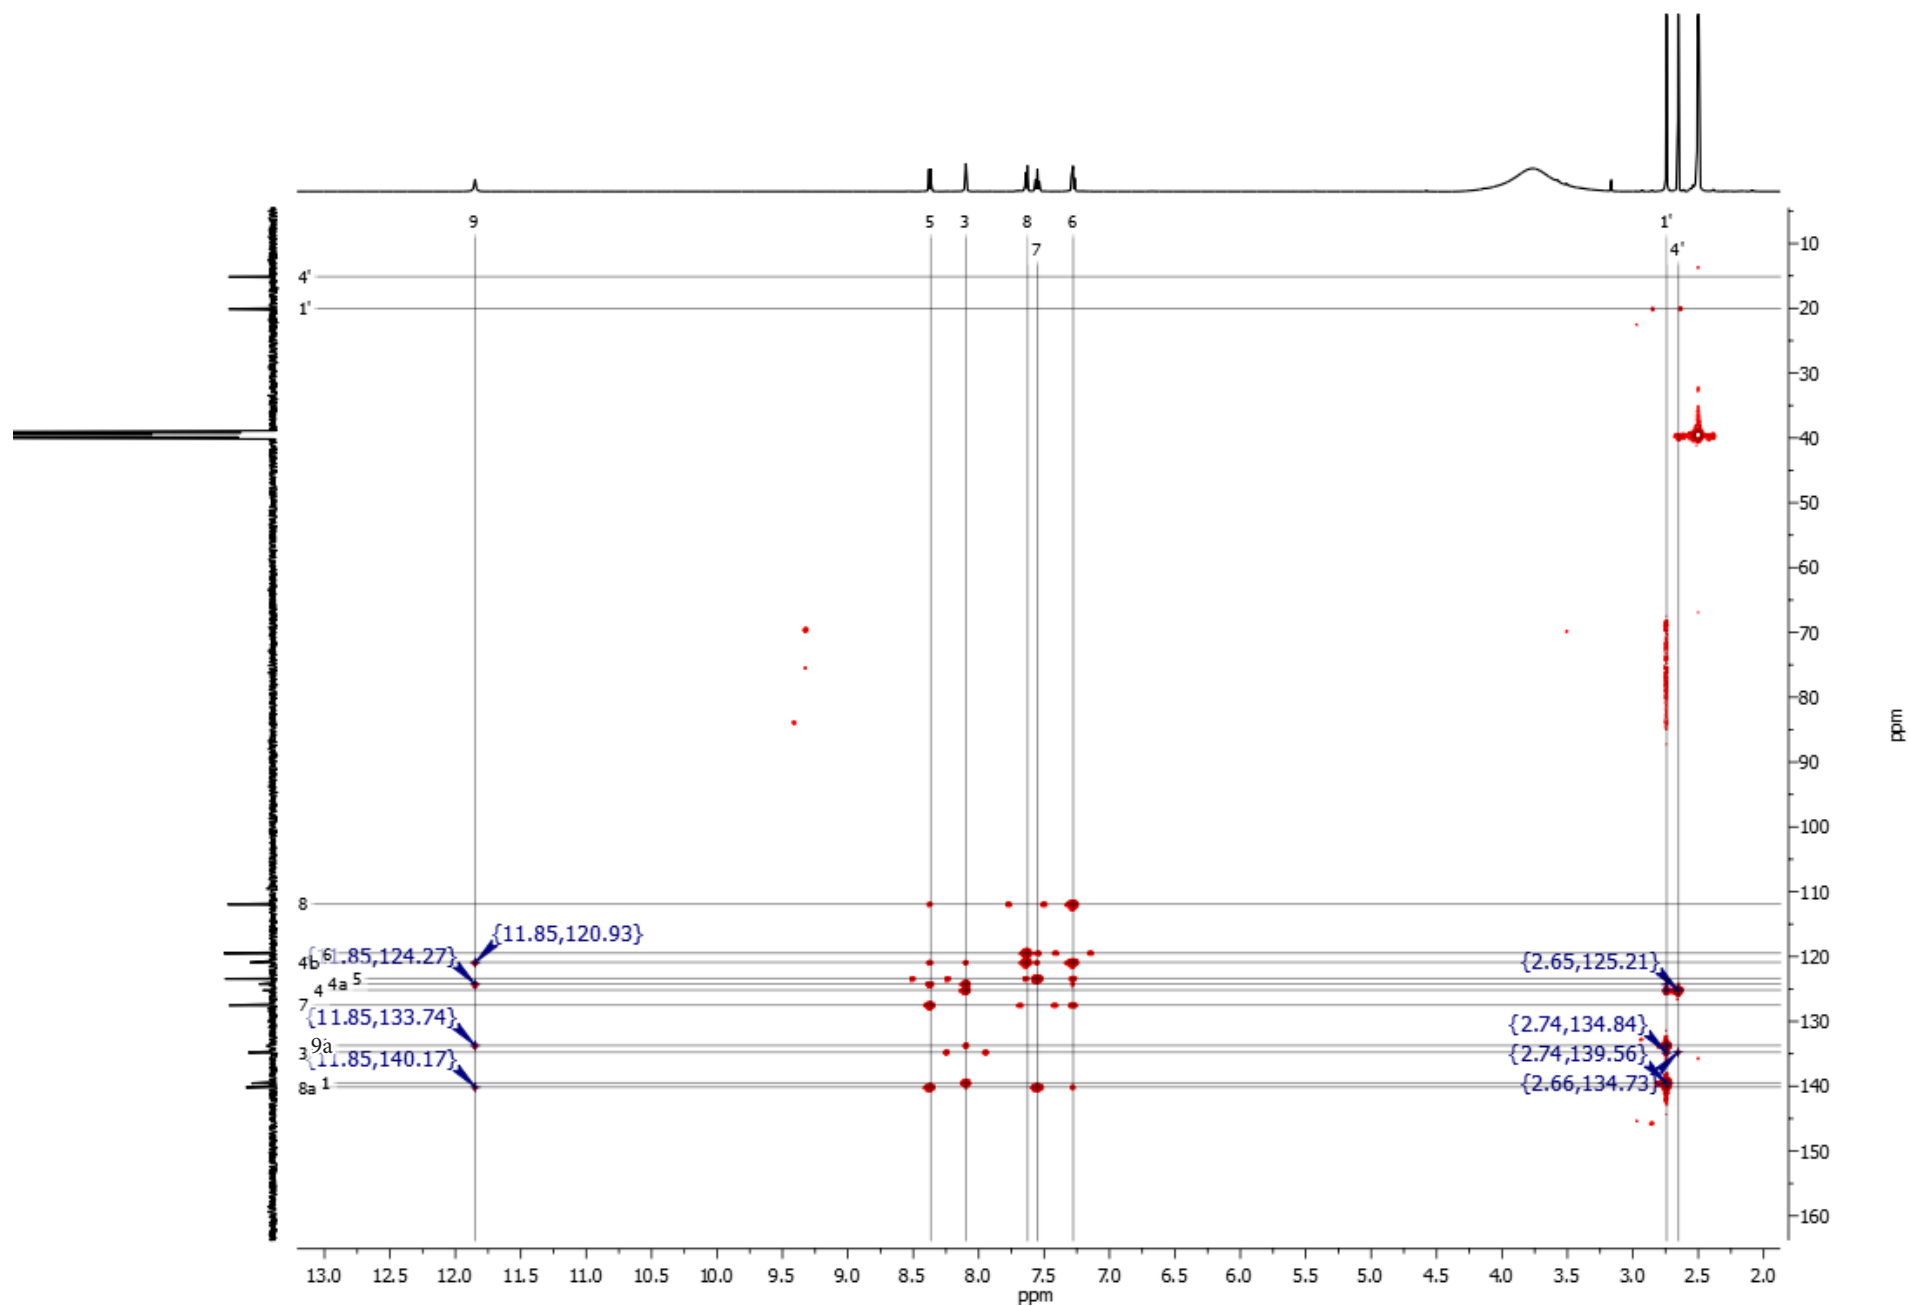



Figure S6. gHMBCAD NMR spectrum (downfield expansion) of 1-methyl-4methylthio- $\beta$ -carboline (1), (600 MHz, DMSO-d<sub>6</sub>)

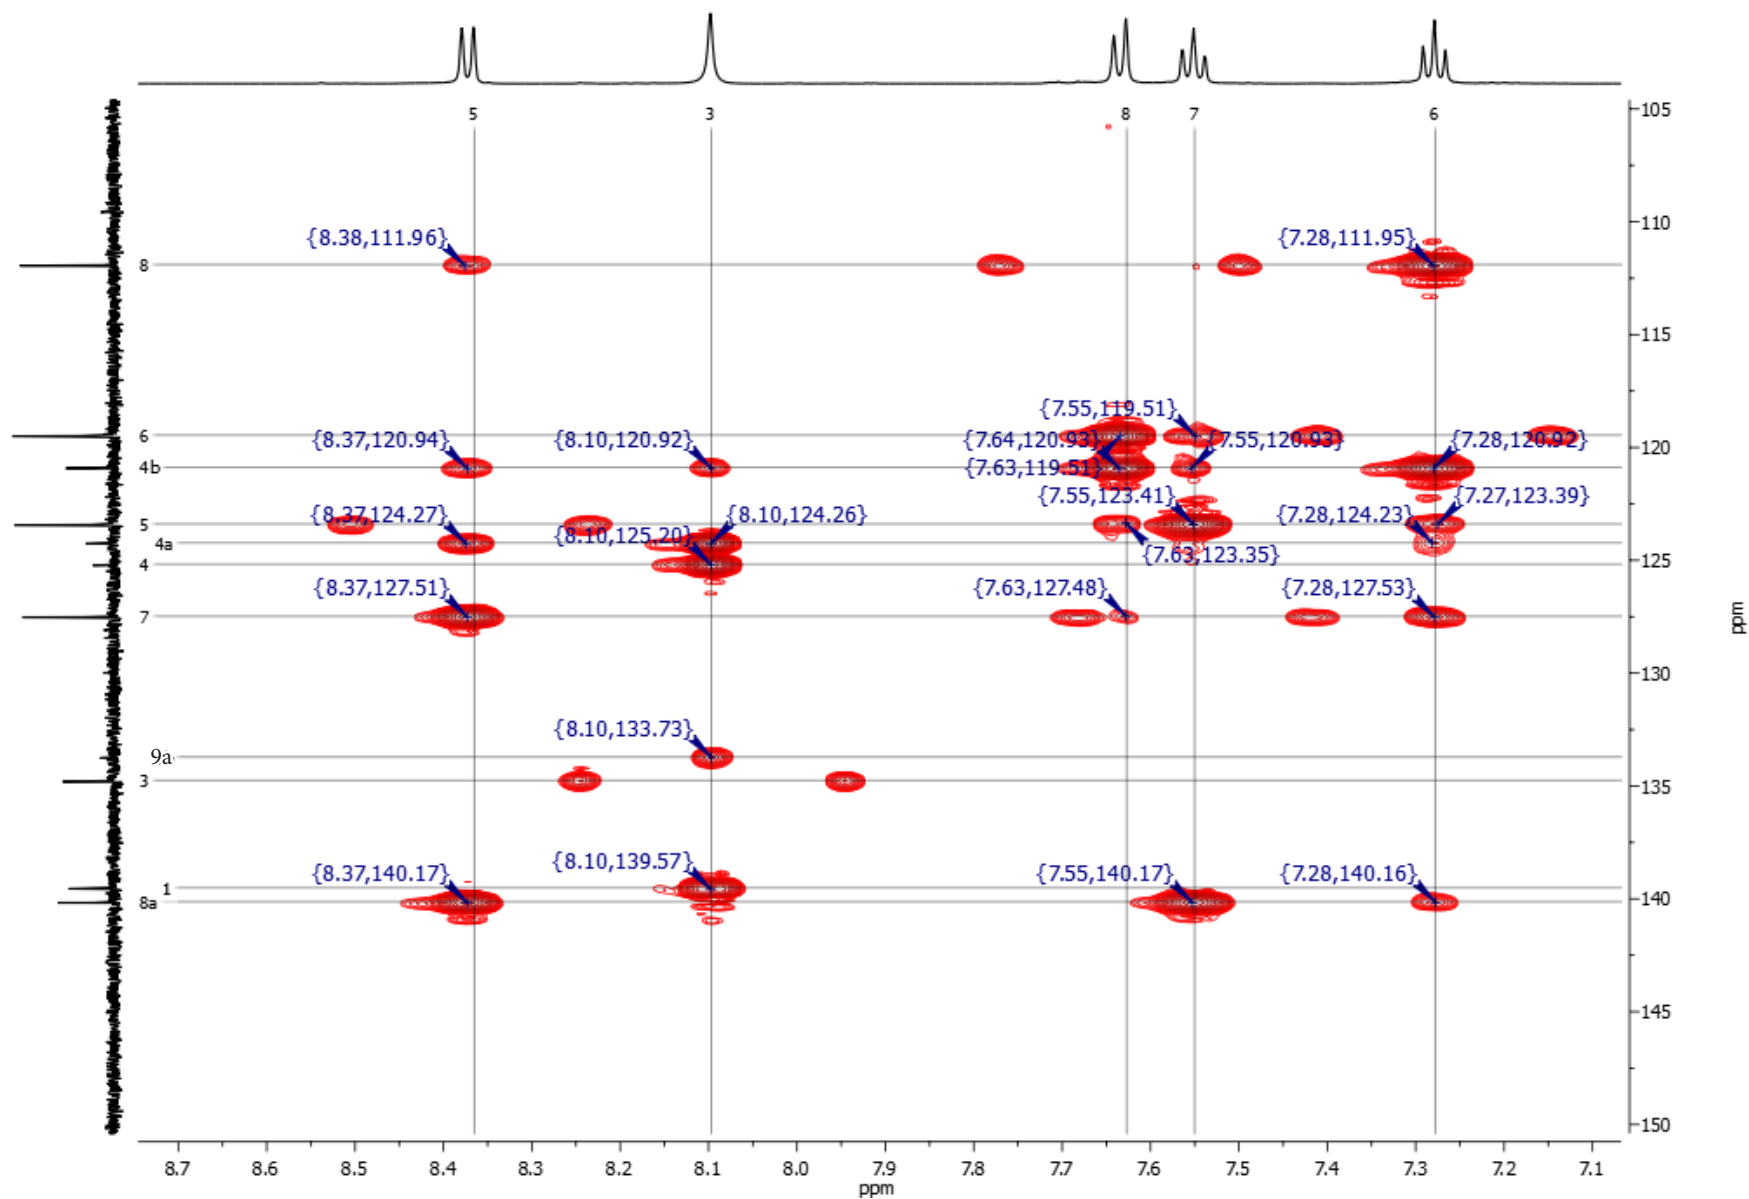

Figure S7. gHMBCAD NMR spectrum ( $^1J_{CH}$  measurements) of 1-methyl-4methylthio- $\beta$ -carboline (1), (600 MHz, DMSO-d6)

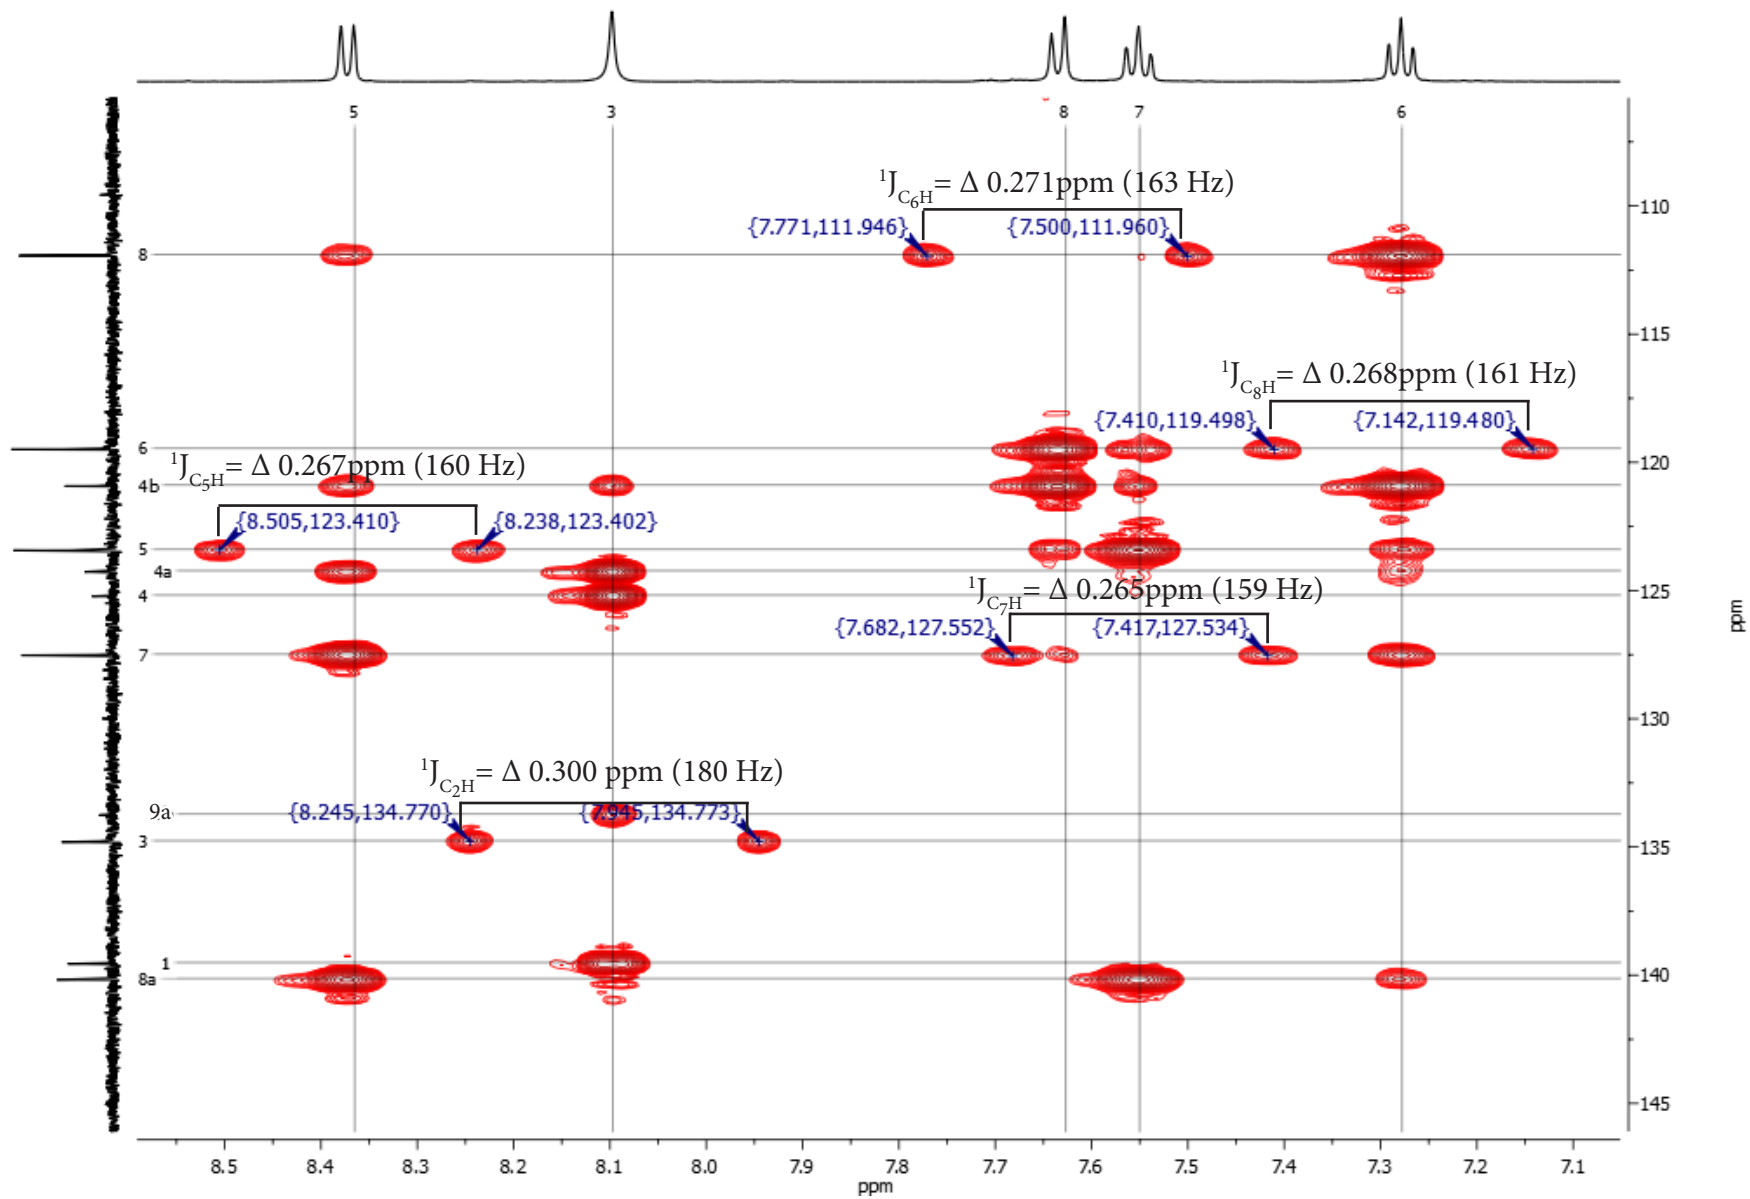

**Figure S8.** gHMBCAD NMR spectrum ( $^1J_{\text{CH}}$  measurements) of 1-methyl-4methylthio- $\beta$ -carboline (1), (600 MHz, DMSO-d<sub>6</sub>)

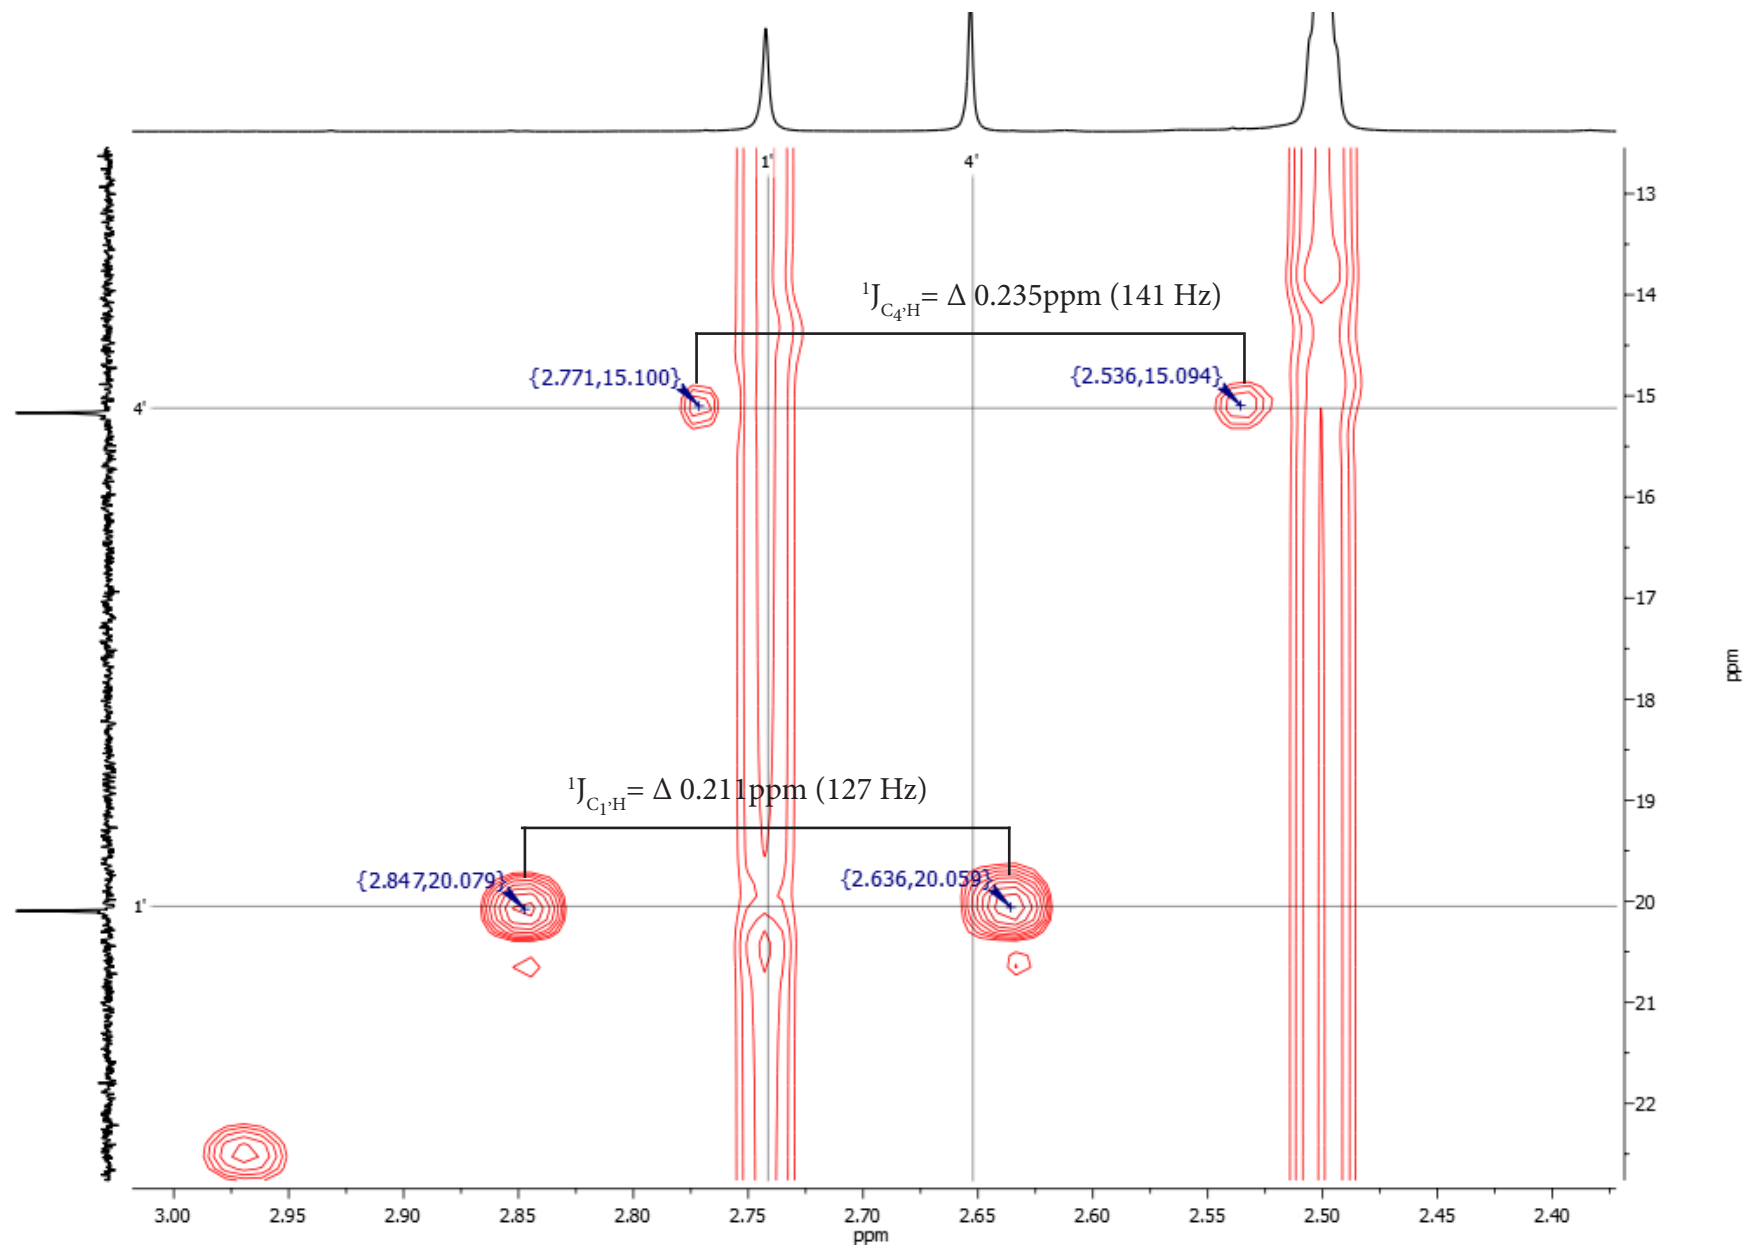

Figure S9.  $^1\text{H}$ - $^1\text{H}$  gCOSY of 1-methyl-4methylthio- $\beta$ -carboline (1), (600 MHz, DMSO-d6)

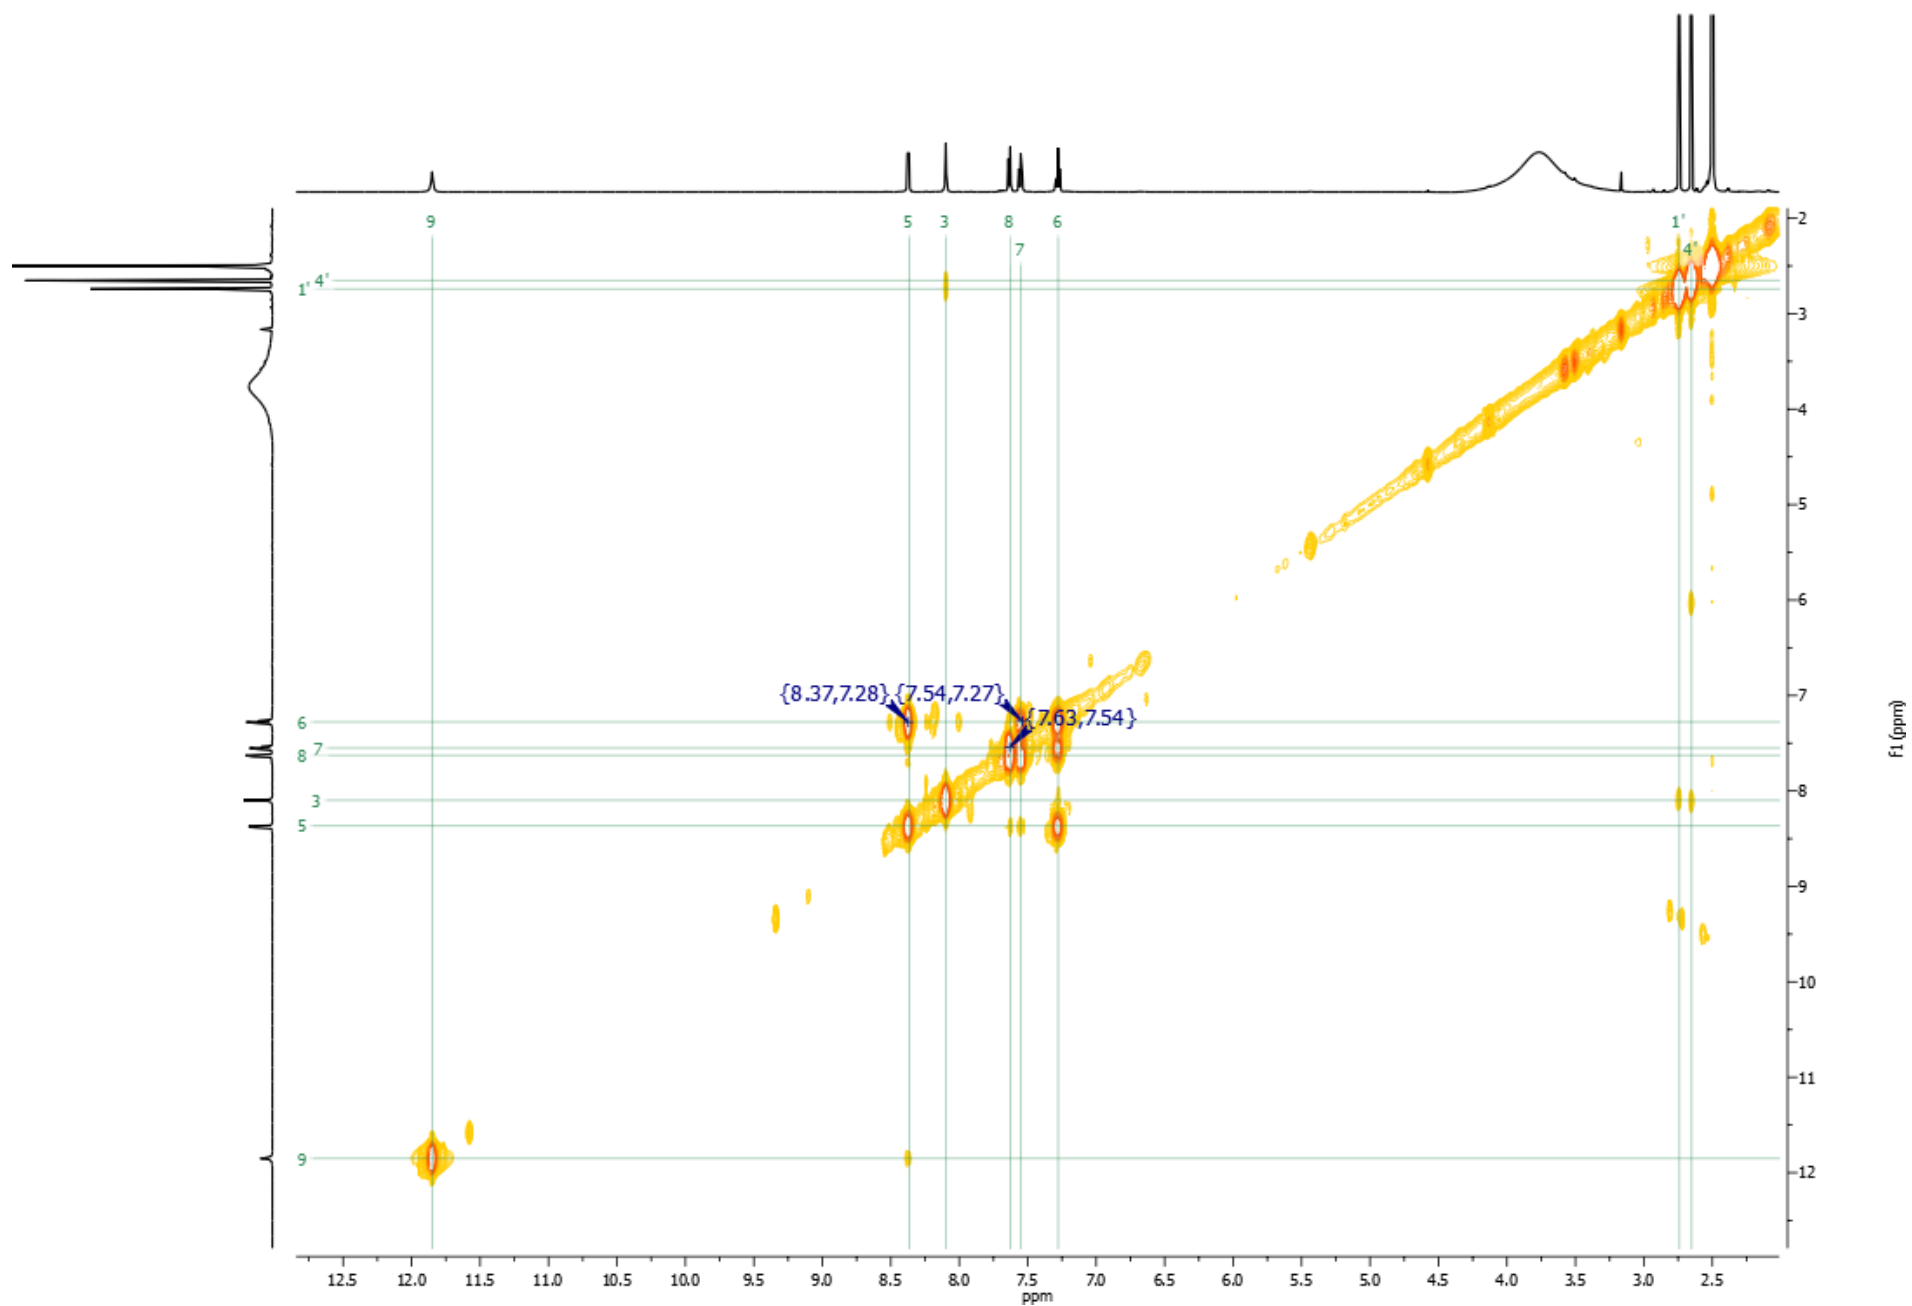

Figure S10. NOESY NMR spectrum of 1-methyl-4methylthio- $\beta$ -carboline (1), (600 MHz, DMSO-d6)

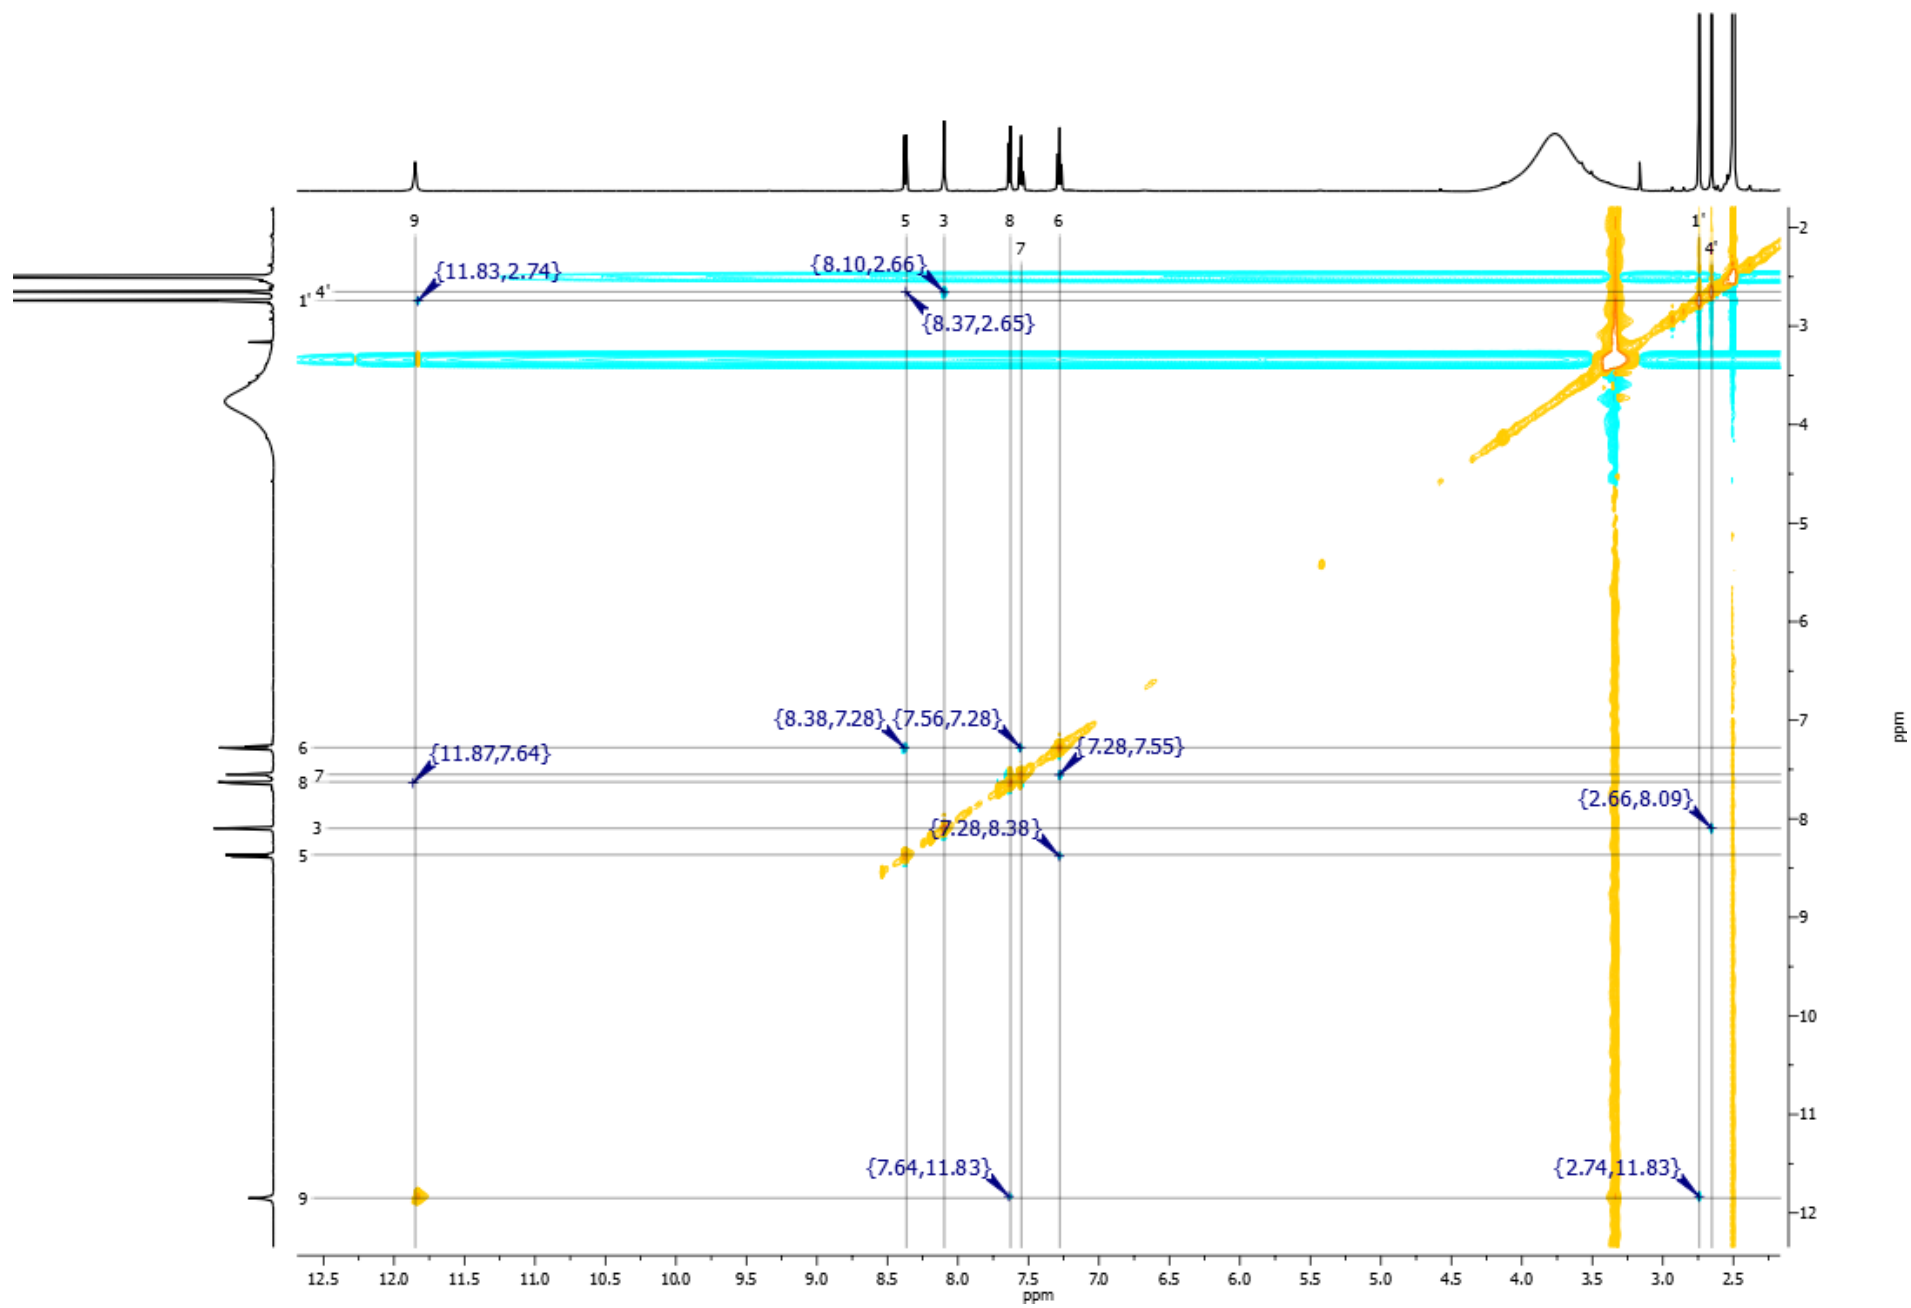

**Figure S11.** 1D nOe NMR spectra of 1-methyl-4methylthio- $\beta$ -carboline (1) irradiated at 2.65 ppm (50Hz width), (600 MHz, DMSO-d<sub>6</sub>)

Key: 1 - full proton; 2 - 500 ms mixing time; 3 - 600ms; 4 - 700 ms; 5 - 800 ms

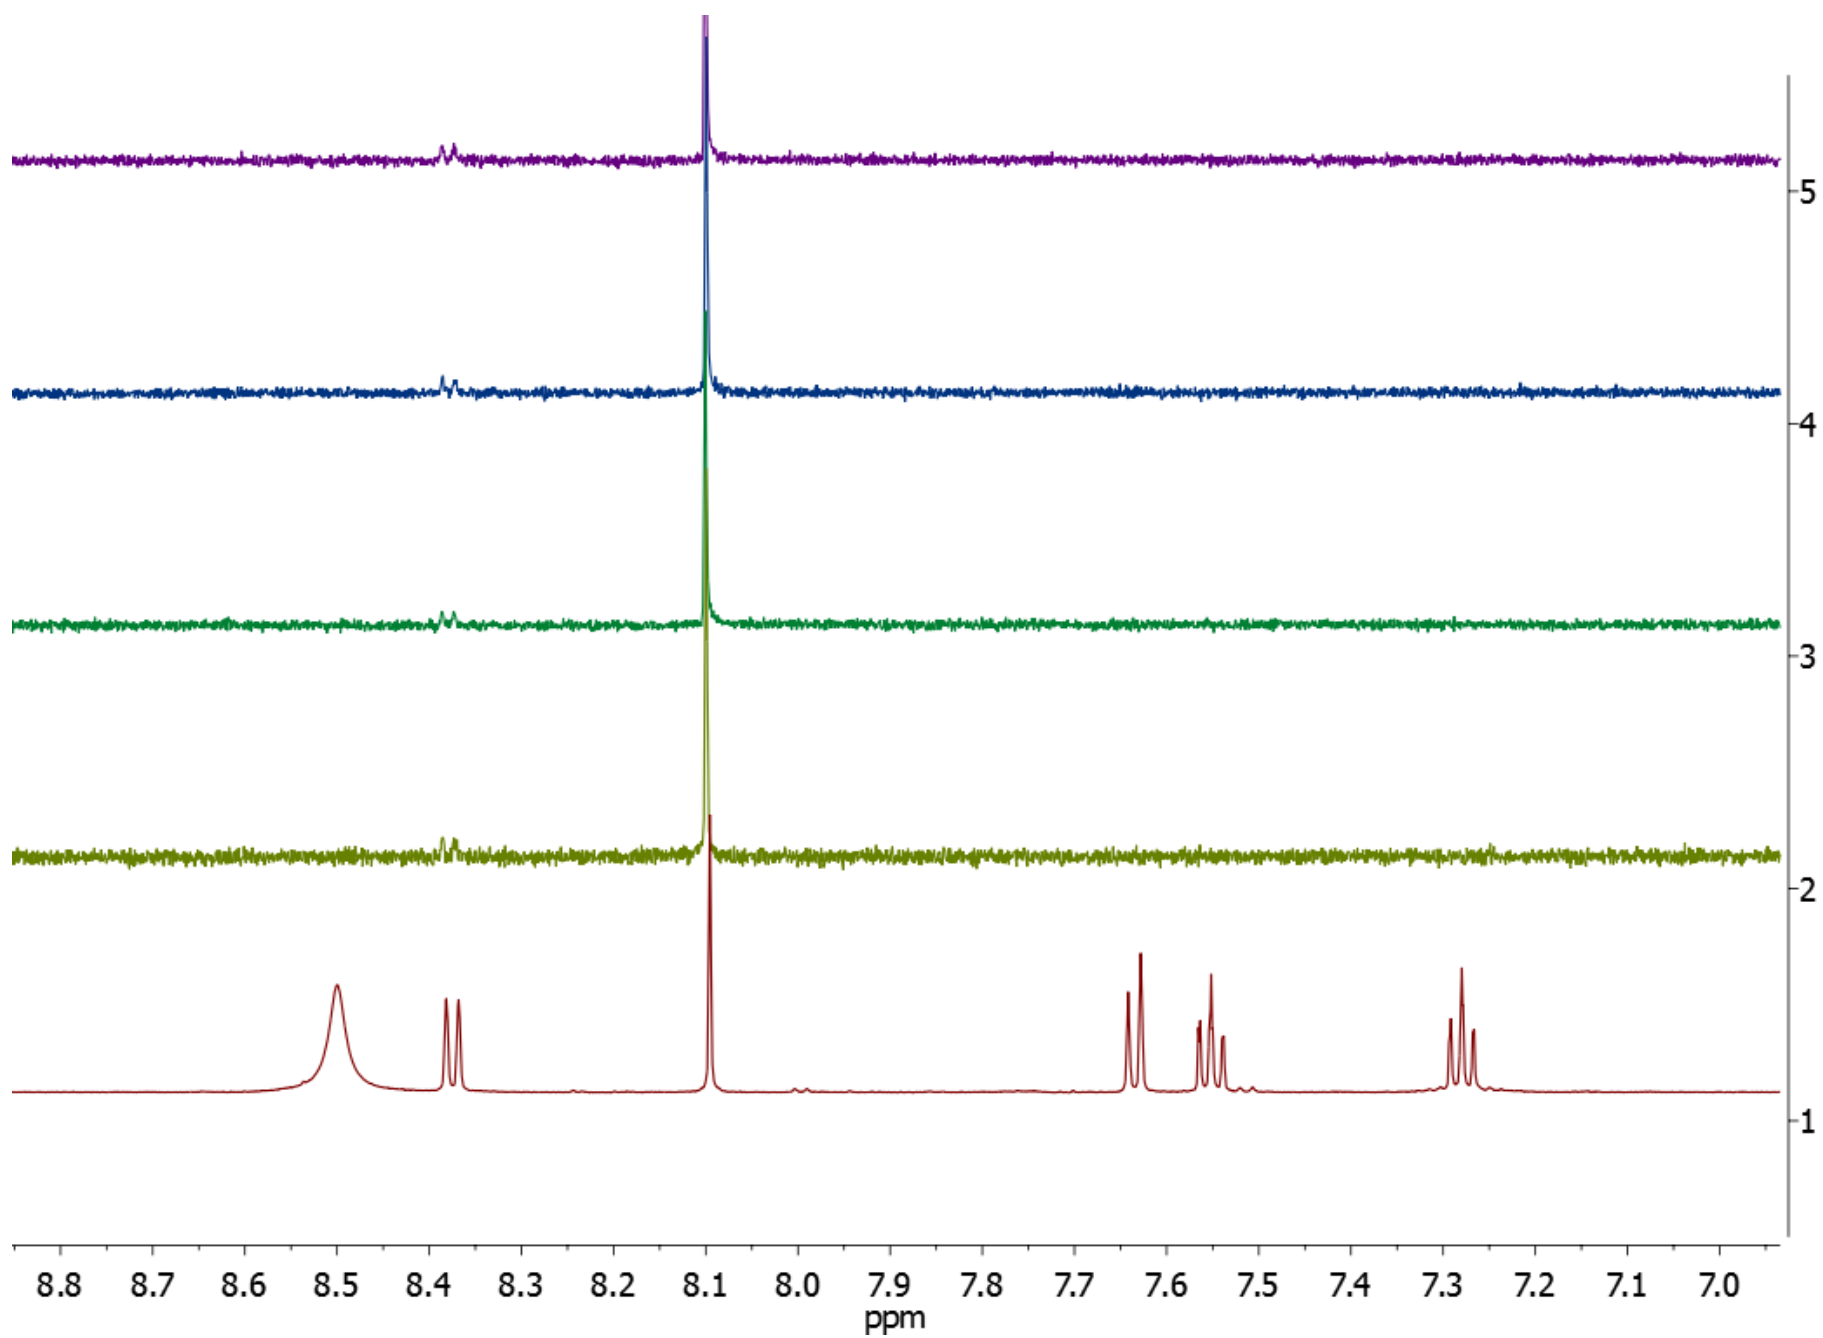

Figure S12. UV spectrum of 1-methyl-4-methylthio- $\beta$ -carboline (1)

302AxF3 #1835 RT: 6.12 AV: 1 NL: 1.99E6 microAU

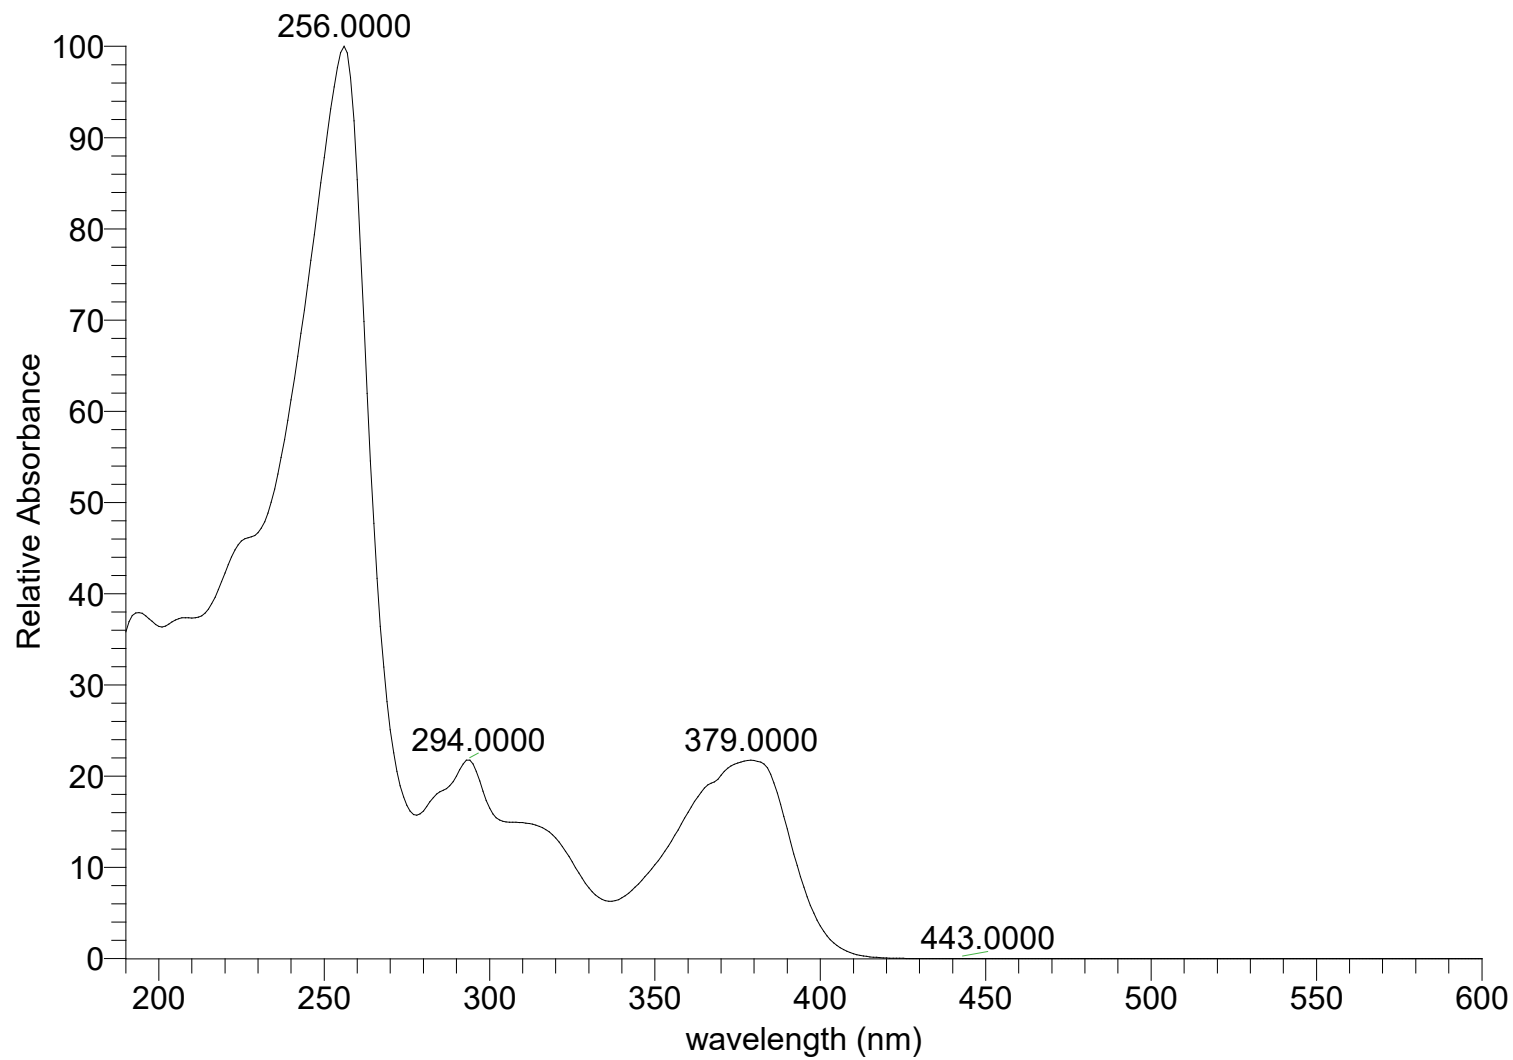

Figure S13. IR spectrum of 1-methyl-4-methylthio- $\beta$ -carboline (1)

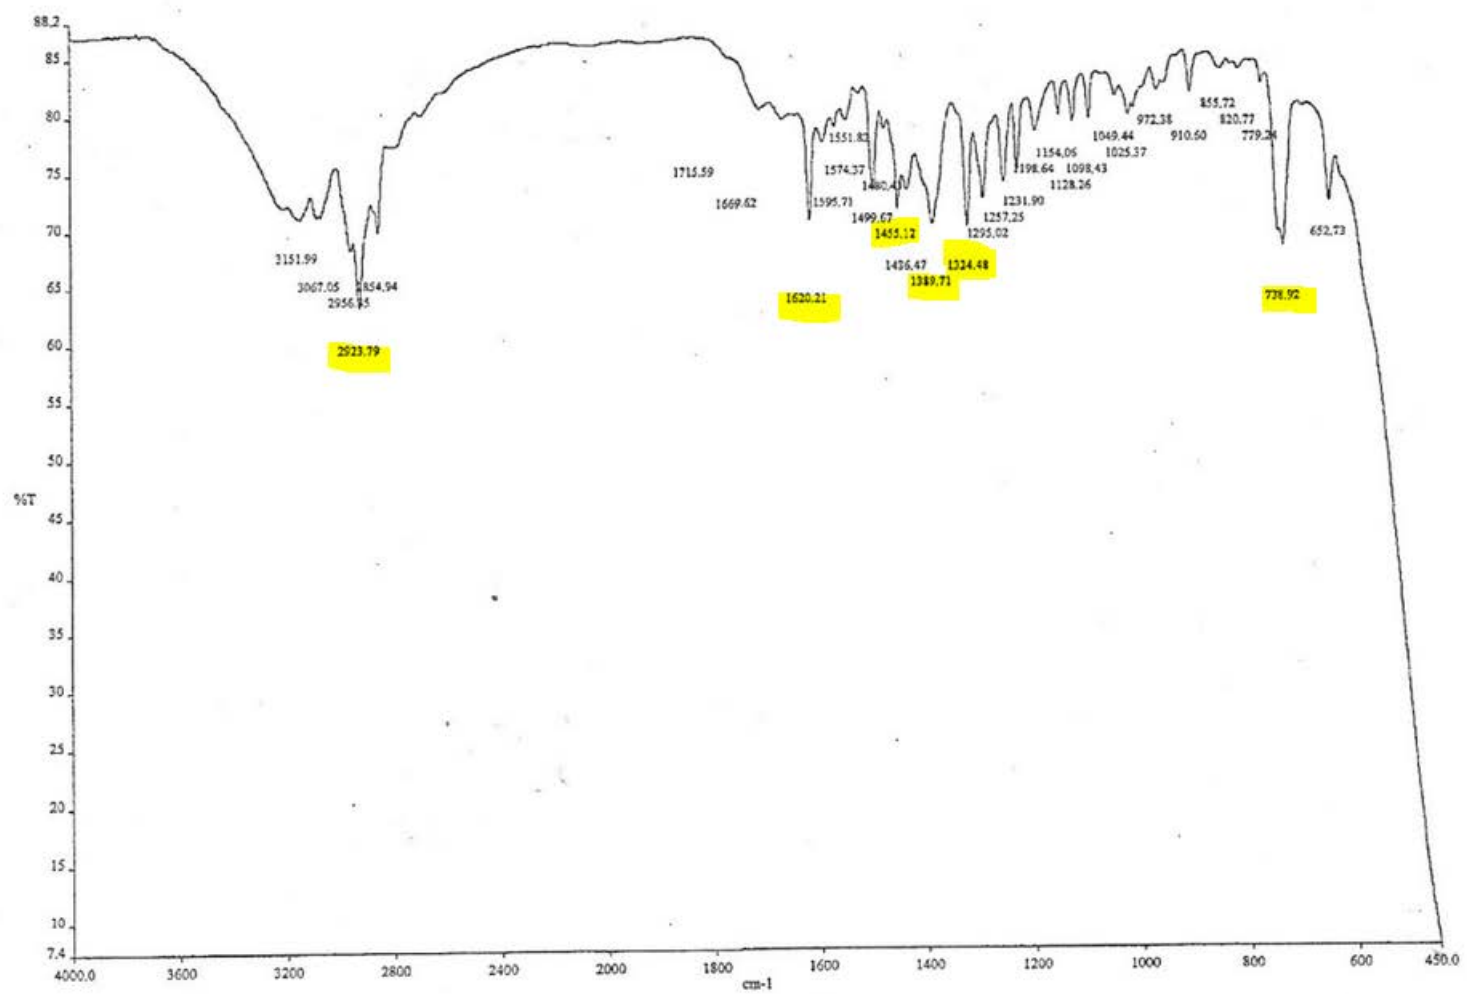



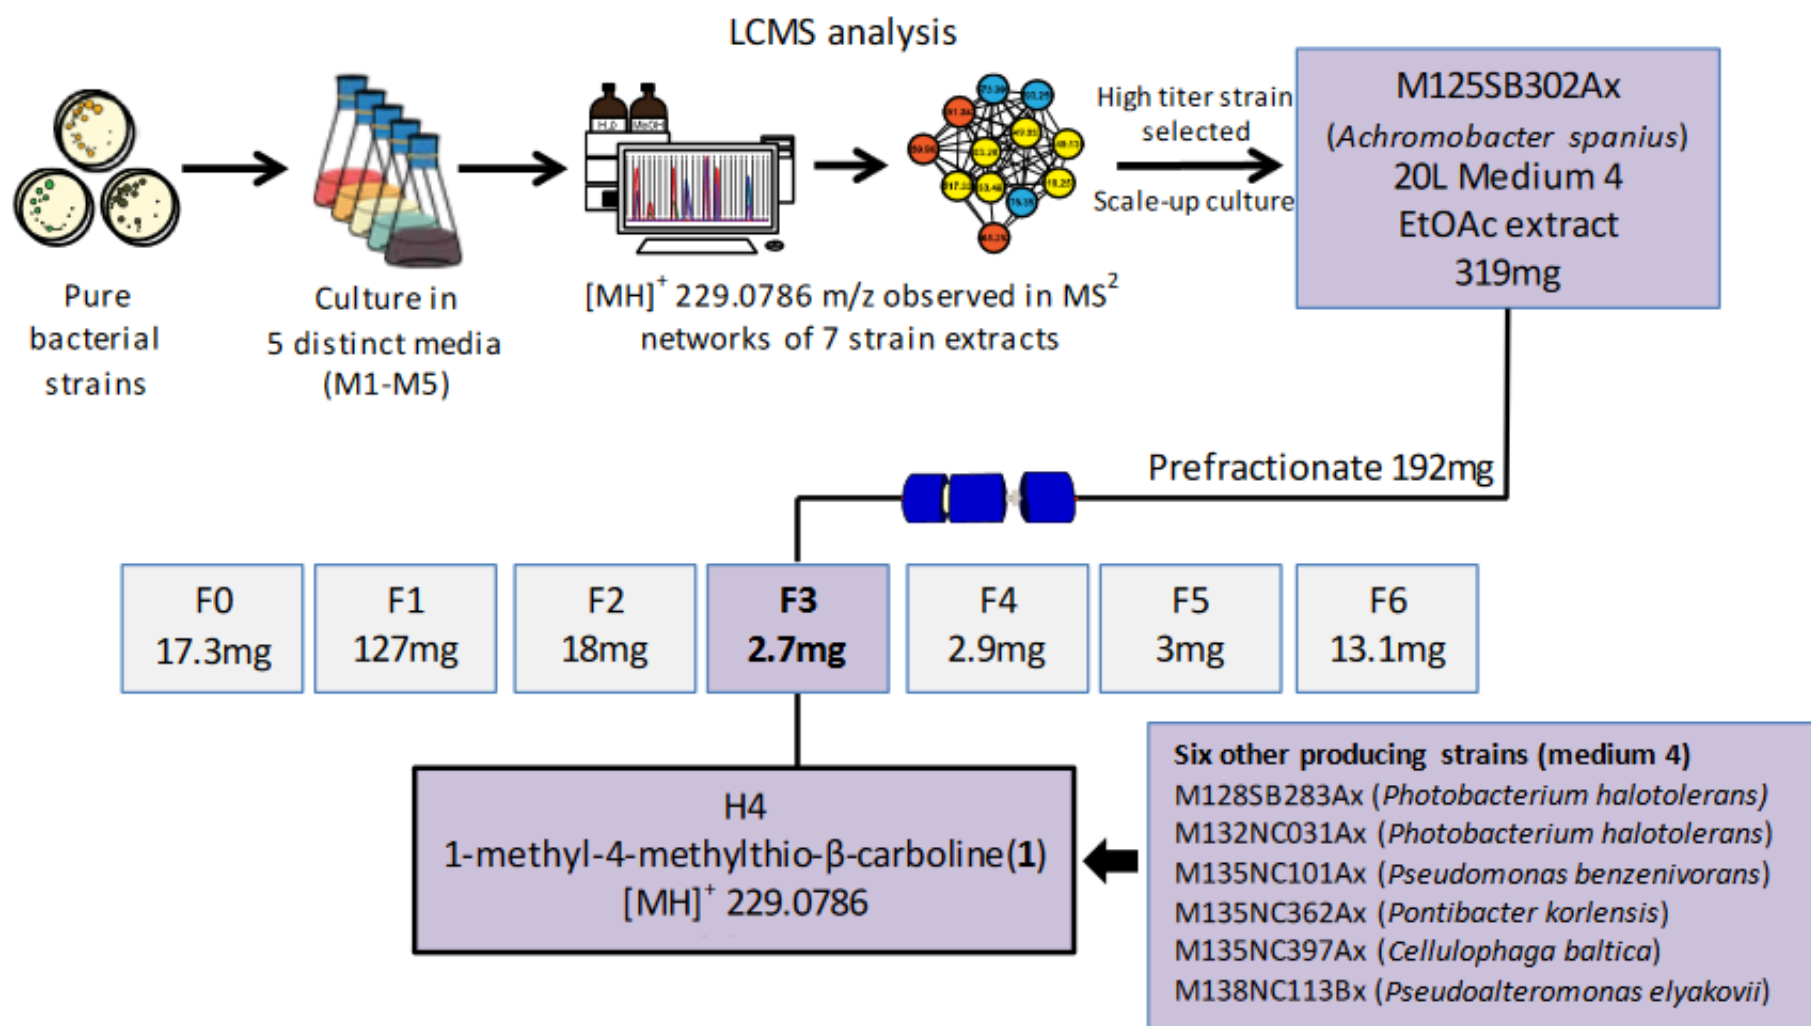

**Figure S14.** Survey of seven CA littoral zone Gram-negative bacteria strains assessed by LCMS for their capacity to produce 1-methyl-4-methylthio-β-carboline (1) and subsequent steps for its purification from strain M125SB302Ax. See Table S1 for media composition.

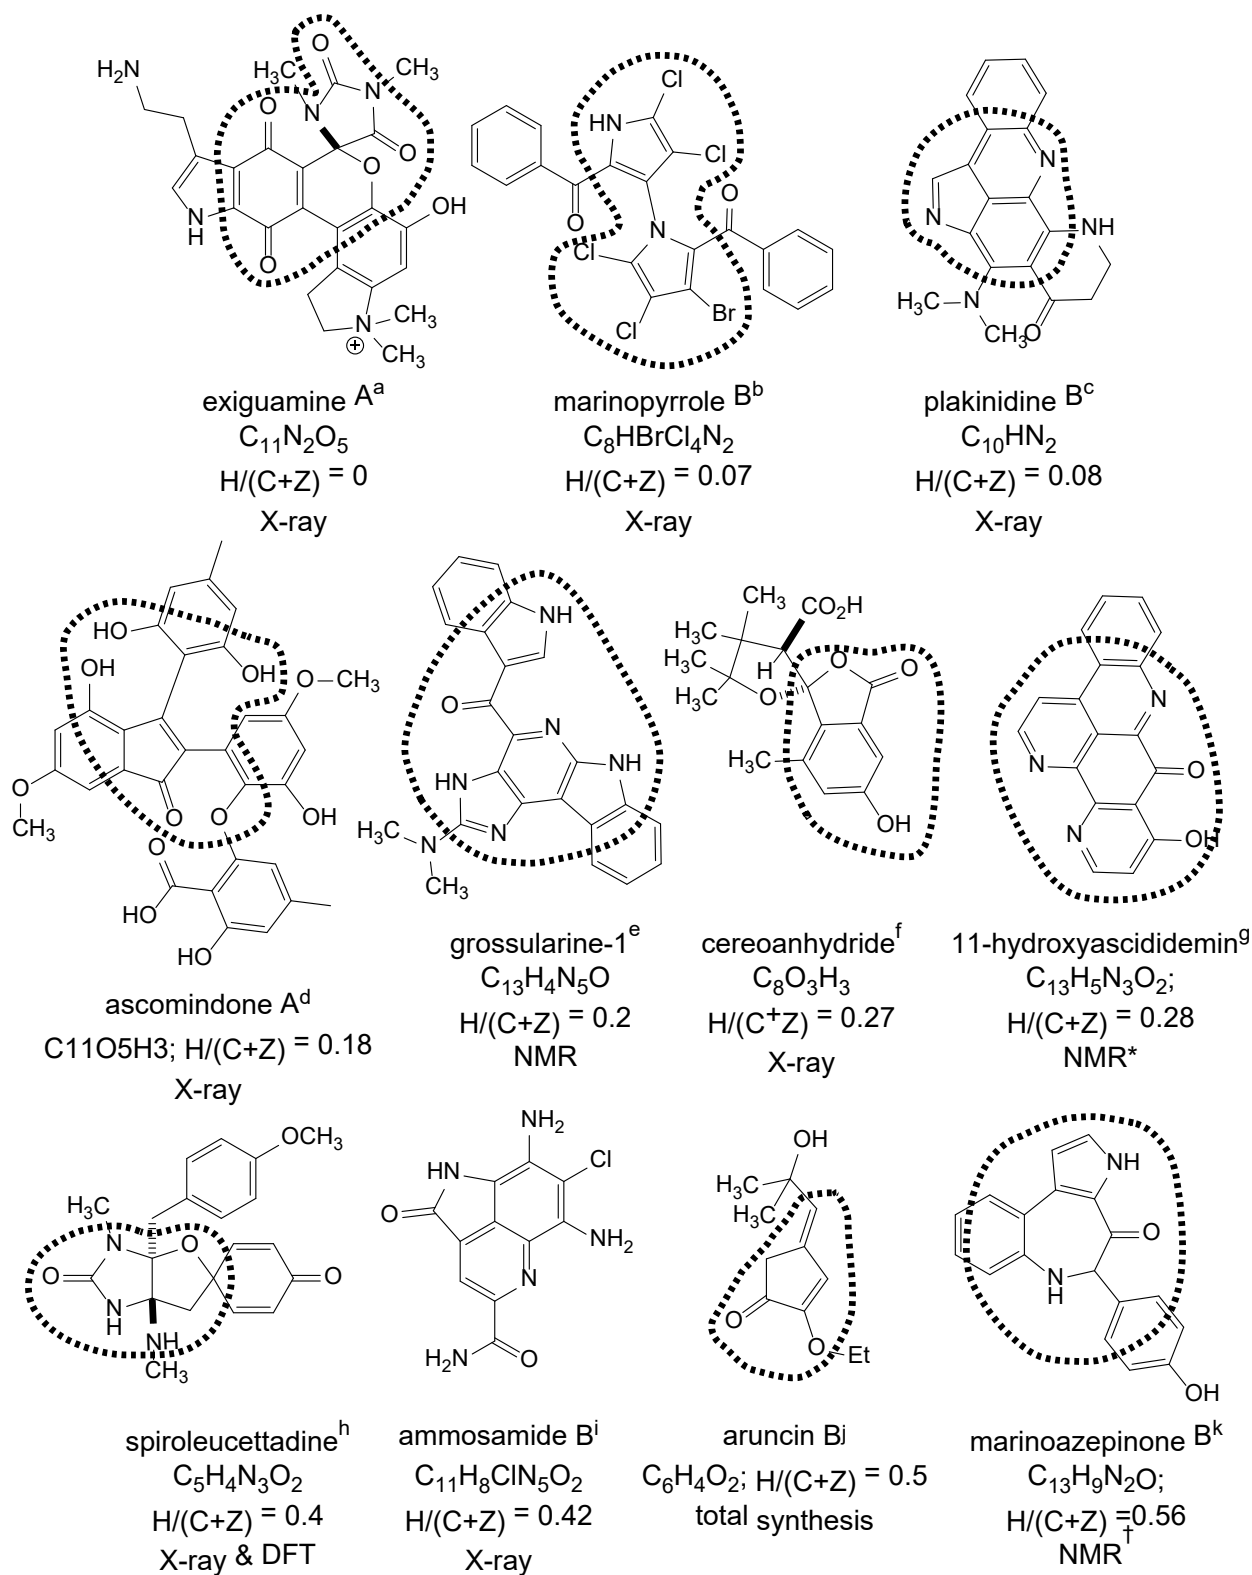

**Figure S15.** Select examples of structure assignment outcomes of natural products that possess a core  $H/(C+Z) < 0.6$  ( $C+Z = \sum \#C + \# \text{heteroatoms}$ ). These molecules are particularly challenging to elucidate using 2D NMR data as denoted by “Crews Rule.” Molecular formulas represent highlighted region of molecules only. \*data does not rule out other structures. <sup>†</sup>based on comparison to marinoazepinone A, which has an additional N-CH<sub>3</sub> and  $H/(C+Z) = 0.65$ . Reference letters correspond to reference 26 in the main text.

**Figure S16.** Querying medium 4 control for  $m/z$  229.0794 (i.e. 1) via extracted ion chromatography (XIC) searches. The normalization level (NL) shown at the right of each panel provides an ion current value for a peak with 100% relative abundance. The top trace [A] shows total ion chromatogram (TIC) from the media 4 control; a culture blank not inoculated with any Gram-negative bacterium and not expected to contain secondary metabolites. The trace [B] shows and XIC for the sample shown in [A] and confirms that the peaks at 3.00-3.07 minutes are devoid of the  $m/z = 229.07$  compound. The trace [C] documents, by XIC, that retention time of 1 ( $m/z = 229.07$ ), produced by the indicated strain, is 3.07 minutes.

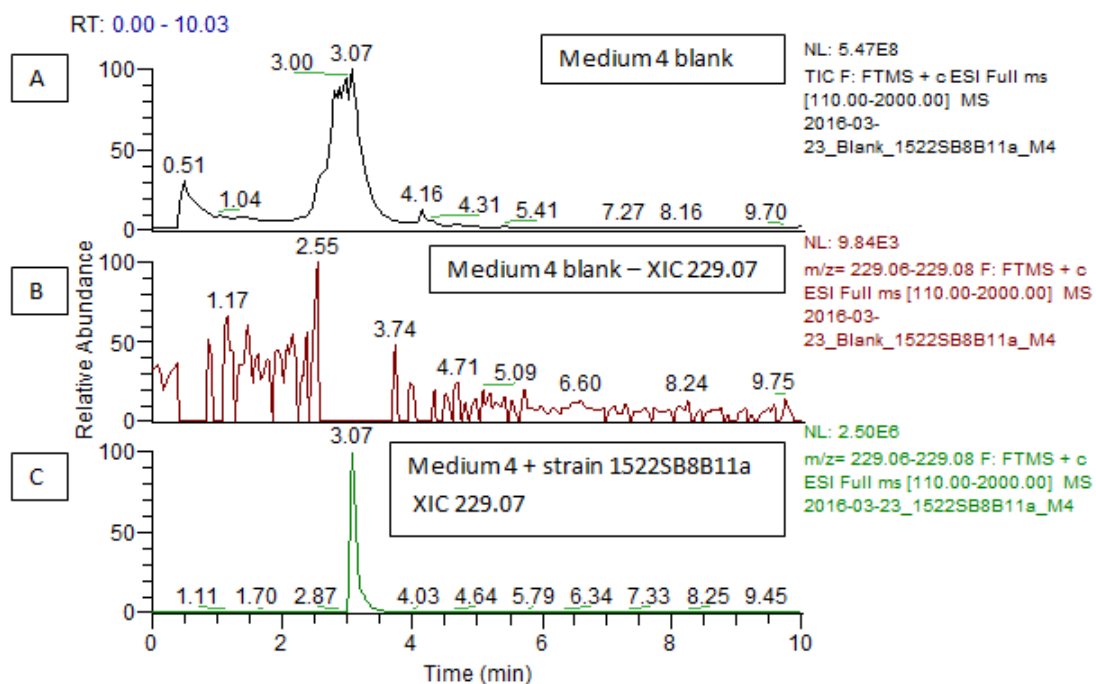

**Figure S17.** Querying for oxidized analogues of **1** via extracted ion chromatography (XIC) searches. The normalization level (NL) shown at the right of each panel provides an ion current value for a peak with 100% relative abundance. The top trace [A1] shows total ion chromatogram (TIC) peaks from the media 4 plus Gram-negative strain M125SB302Ax of the parent crude extract containing **1**. The traces [A2-A4] show three different XICs of the same parent crude extract. The trace [A2] documents that the retention time of **1** is 3.09 minutes (also observed in trace [A1]). Though panel [A3] shows XIC peaks (rt = 1.2-1.65) their mass spectra (not shown here) are not consistent with compounds of formula  $C_{13}H_{13}N_2OS$ . Trace [A4] also shows possible evidence for the presence of a doubly oxidized **1** ( $C_{13}H_{13}N_2O_2S^+$ ) in the XIC peaks at rt = 2.85 min. and 2.97 min and is supported by the experimental vs. predicted MS shown in [B]. However the lower ion count indicates a compound of this formula is possibly present but in a minute amount: approximately 200 fold less abundant than **1** based on their relative ion counts (NL) between trace [A2] and [A4].

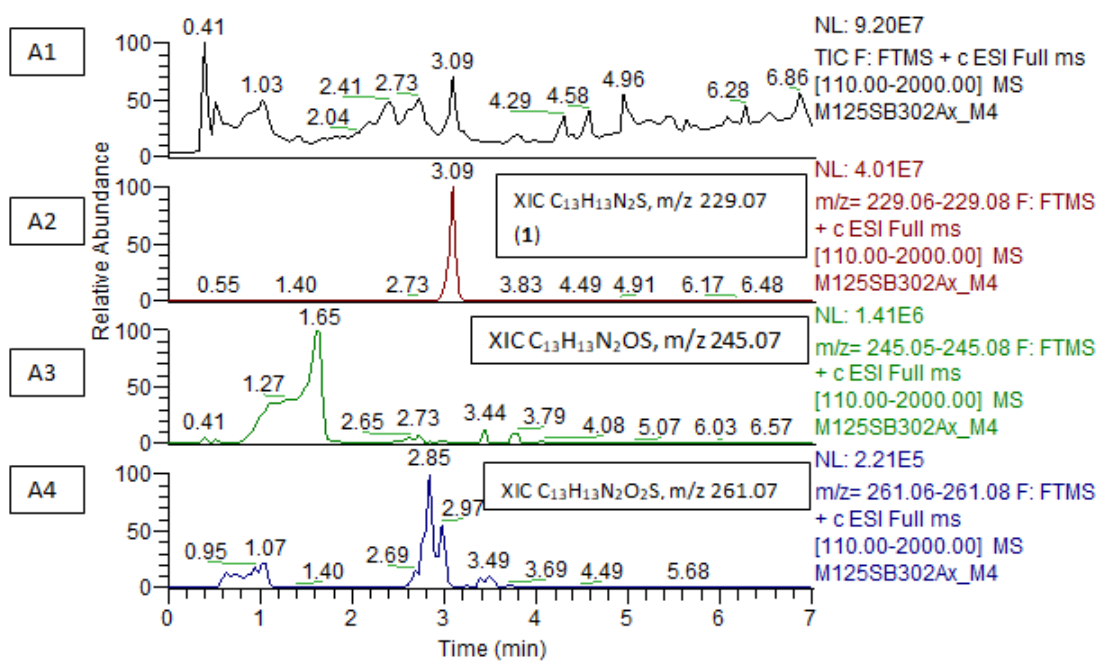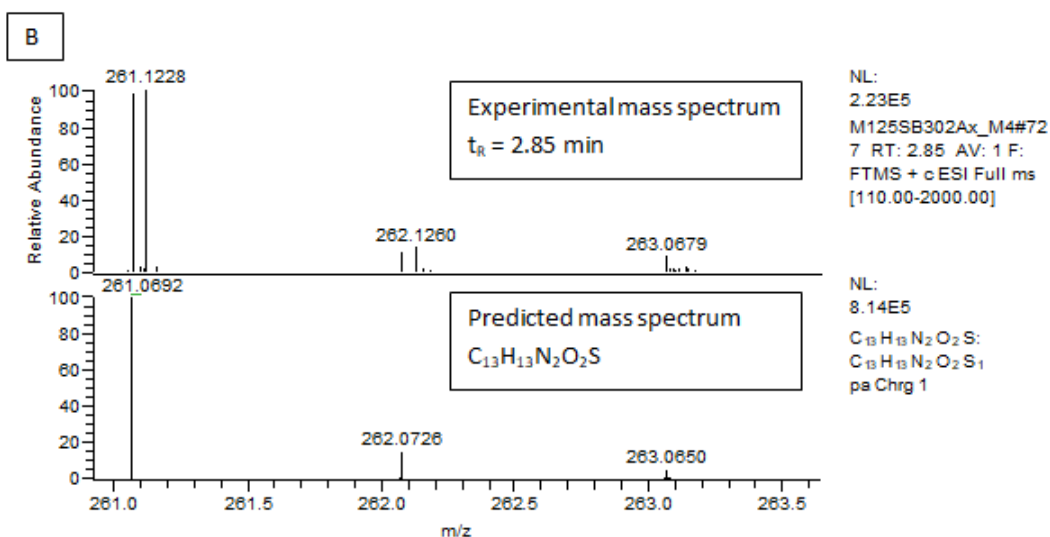

**Chart S1.** Reference  $^1J_{\text{CH}}$  values for relevant  $\text{sp}^2$  and  $\text{sp}^3$  carbons

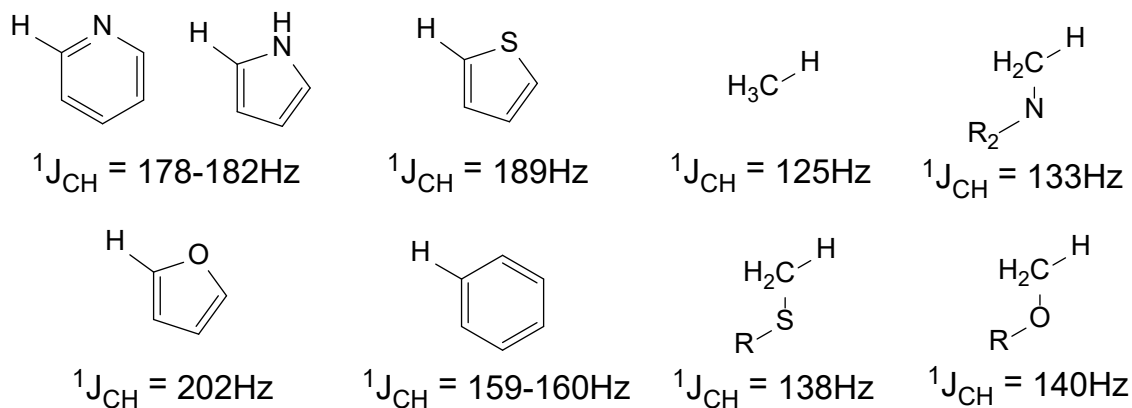

**References:**

- (1) Crews, P.; Rodríguez, J.; Jaspars, M. *Organic Structure Analysis*, 2nd ed.; p. 150; Oxford University Press: New York, 2010.
- (2) Reich, H. C-H Coupling Constants. *Structure Determination Using NMR*. <http://www.chem.wisc.edu/areas/reich/nmr/10-cdata-05-jch.htm> (accessed Mar 28, 2017).
